# Supplementary material for: A heavy molybdenum reservoir in Neoarchean seawater tracks extensive iron oxidation
Source: Research Square preprint supplement (doi:10.21203/rs.3.rs-7181523/v1), 2025-07-24
Supplement: Supplementary file 2 [file c697c50b834ffd43377b5339.xlsx]

## Sheet: Sheet1
Table S2. Molybdenum, total sulfur, total organic carbon, and selected geochemcial compositions and Mo isotope data of late Archean banded iron formations in the North China Craton
Formation	Sample	Depositional age (Ga)	δ98Mo (‰)	2σ	Mo (ppm)	TS (wt%)	TOC (wt%)	Al2O3 (wt%)*	Fe2O3T (wt%)*	MnO (wt%)*	(Ce/Ce*)SN	Reconstructed seawater δ98Mo (‰)	Detrital-corrected δ98Mo (‰) using continental Mo/Al ratio (0.13 ppm/wt%) (Rudnick and Gao, 2014) and δ98Mo value (0.4‰) (Voegelin et al., 2014)
Xiaolaihe	XLH-1	2.57	0.49743	0.0323333	0.395262	0.06	0.09	0.8	60.54	0.05	0.999229	1.60 based on the lowest δ98Mo value	0.513198
Xiaolaihe	XLH-2	2.57	1.08508	0.0179344	1.06868	0.53	0.22	0.92	45.61	0.12	0.958588		1.12823
Xiaolaihe	XLH-3	2.57	1.17659	0.0287605	0.724425	0.82	0.07	0.77	51.41	0.09	0.974815		1.23788
Xiaolaihe	XLH-4	2.57	1.51071	0.0382196	0.55562	0.72	0.03	0.36	53.85	0.04	0.863284		1.56255
Xiaolaihe	XLH-5	2.57	1.4685	0.0342061	2.4012	2.12	0.03	0.23	56.15	0.03	0.874716		1.47559
Xiaolaihe	XLH-5r	2.57	1.53919	0.0288319	2.3152								1.53919
Xiaolaihe	XLH-6	2.57	1.29246	0.0311313	0.204579	0.66	0.01	0.19	55.07	0.06	0.848458		1.3534
Xiaolaihe	XLH-7	2.57	0.793794	0.0259073	0.363245	0.47	0.03	0.2	53.41	0.05	0.861166		0.809304
Xiaolaihe	XLH-8	2.57	1.51882	0.032293	0.438329	1.18	0.05	0.39	54.27	0.04	0.872463		1.5918
Xiaolaihe	XLH-9	2.57	1.4372	0.0417951	0.512705	0.22	0.03	0.25	55.81	0.06	0.90789		1.47321
Xiaolaihe	XLH-10	2.57	1.1035	0.0421776	0.544148	0.38	0.07	0.97	51.75	0.06	0.87079		1.20188
Nanfen	18PN1-34	2.56	0.303114	0.0276842	0.079582	0.01	0.02	0.01	45.35	0.05	0.834065	1.47 based on average δ98Mo value of eight samples excluding 18PN1-25 and 18PN1-24	0.302269
Nanfen	18PN1-33	2.56	0.362639	0.0390749	0.083533	0.01	0.02	0.01	50.34	0.04	0.798147		0.362329
Nanfen	18PN1-32	2.56	0.316083	0.0373255	0.074113	0.01	0.01	0.01	49.4	0.06	0.82749		0.315297
Nanfen	18PN1-26	2.56	0.423509	0.0434164	0.143573	0.01	0.01	0.02	49.92	0.1	0.810453		0.423736
Nanfen	18PN1-25	2.56	1.50378	0.0388393	0.785797	0.64	0.04	0.04	54.12	0.08	0.804048		1.50766
Nanfen	18PN1-24	2.56	0.776889	0.049593	0.623035	0.47	0.01	0.01	52.96	0.05	0.814741		0.777306
Nanfen	18PN3-2	2.56	0.329531	0.0367684	0.1486	0.11	0.03	0.06	27.28	0.21	0.870775		0.327517
Nanfen	18PN1-12	2.56	0.364236	0.0385404	0.543346	0.02	0.03	0.07	16.54	0.02	0.853253		0.363916
Nanfen	18PN1-11	2.56	0.392322	0.0419322	0.433478	0.01	0.01	0.11	38.73	0.09	0.80649		0.392185
Nanfen	18PN1-10	2.56	0.43733	0.0333908	0.493155	0.04	0.01	0.15	56.37	0.25	0.854317		0.438128
Qidashan	TQ13-1	2.51	0.408695	0.0358727	0.079758	0.01	0.01	0.01	48.45	0.03	0.859762	1.50 based on average δ98Mo value of seven samples excluding Q4-2, Q2-3, and Q2-2	0.408771
Qidashan	Q9-1	2.51	0.385331	0.0588049	0.064583	0.01	0.02	0.05	39.58	0.17	0.878733		0.384506
Qidashan	TQ13-2	2.51	0.302922	0.0274374	0.075403	0.01	0.01	0.01	45.54	0.05	0.884594		0.302028
Qidashan	Q4-2	2.51	0.986838	0.0392205	0.170231	0.56	0.01	0.05	53.73	0.05	0.744654		0.998945
Qidashan	Q3-2	2.51	0.498195	0.054792	0.0843686	0.01	0.01	0.01	44.31	0.06	0.828027		0.499003
Qidashan	Q2-3	2.51	0.822507	0.0241561	0.130612	0.48	0.01	0.04	47.11	0.01	0.805914		0.831604
Qidashan	Q2-2	2.51	0.939327	0.0243041	0.137236	0.51	0.03	0.02	46.79	0.02	0.865345		0.944791
Qidashan	Q2-1	2.51	0.375785	0.0162227	0.10302	0.01	0.01	0.02	47.18	0.02	0.621669		0.375457
Qidashan	Q13-2	2.51	0.358564	0.0360298	0.0637181	0.01	0.01	0.03	42.31	0.09	0.744654		0.357177
Qidashan	Q10-2	2.51	0.445489	0.0353927	0.098367	0.01	0.01	0.04	49.61	0.01	0.823318		0.446798
Ekou	WEK-9e	2.53	0.496479	0.0251673	0.550941	0.15	0.01	0.74	42.61	0.07	1.02255	1.56 based on average δ98Mo value of eight samples excluding EK-9b and Ek-6c	0.506306
Ekou	WEK-9d	2.53	0.510064	0.0396532	0.445645	0.08	0.01	0.89	36.82	0.07	1.02683		0.527602
Ekou	WEK-2e	2.53	0.482157	0.0317364	0.33047	0.04	0.01	0.39	43.52	0.15	0.989974		0.48942
Ekou	WEK-2d	2.53	0.461609	0.0268419	0.585272	0.06	0.01	0.94	47.81	0.12	0.990346		0.469266
Ekou	NEK-4d	2.53	0.403348	0.0289643	0.326918	0.1	0.01	0.23	55.3	0.19	0.973157		0.403518
Ekou	NEK-4b	2.53	0.491401	0.0336309	0.504326	0.06	0.01	0.5	27.05	0.05	1.03825		0.498094
Ekou	NEK-4a	2.53	0.376068	0.0239556	0.340531	0.14	0.03	0.32	46.55	0.09	0.916531		0.374413
Ekou	NEK-2d	2.53	0.455261	0.0407677	0.508836	0.03	0.03	0.36	38.68	0.09	1.01796		0.45809
Ekou	EK-9b	2.53	0.679643	0.0389543	0.429013	0.32	0.01	0.48	45.42	0.1	0.989639		0.702973
Ekou	EK-6c	2.53	1.19336	0.0379014	0.622495	0.85	0.02	0.4	49.04	0.07	0.994505		1.23007
Gongchangling	19G1-13	2.55	0.514316	0.0247389	0.39782	0.06	0.03	0.23	52.61	0.06	0.555988	1.58 based on average δ98Mo value of eight samples excluding 19G1-14 and 19G1-4	0.519053
Gongchangling	19G1-14	2.55	0.726646	0.0298819	0.530807	0.21	0.02	0.3	53.37	0.19	0.776134		0.739866
Gongchangling	19G1-2	2.55	0.518397	0.0261612	0.447452	0.01	0.02	0.32	50.33	0.12	0.862741		0.524526
Gongchangling	19G1-4	2.55	0.720979	0.0234135	0.595684	0.39	0.03	0.94	41.5	0.13	0.936916		0.760086
Gongchangling	19G1-9	2.55	0.402452	0.024852	0.341986	0.12	0.05	0.2	52.28	0.23	0.828475		0.402555
Gongchangling	19G2-10	2.55	0.405615	0.0241278	0.244373	0.01	0.01	0.11	45.72	0.07	0.791867		0.405794
Gongchangling	19G2-11	2.55	0.570371	0.0209979	0.547517	0.02	0.01	0.27	41.95	0.12	0.869633		0.576356
Gongchangling	19G2-8	2.55	0.440987	0.027935	0.191471	0.01	0.01	0.02	48.33	0.05	0.782426		0.441284
Gongchangling	19G2-9	2.55	0.557933	0.0280439	0.184215	0.01	0.01	0.03	50.45	0.06	0.750941		0.559723
Gongchangling	19G4-10	2.55	0.456945	0.039632	0.262394	0.01	0.03	0.04	41.29	0.09	0.763217		0.457549
Sijiaying	19S-29	2.54	0.478129	0.0279589	0.246492	0.05	0.04	0.43	48.48	0.09	0.902219	1.47 based on average δ98Mo value of nine samples excluding 19S-40	0.488789
Sijiaying	19S-30	2.54	0.476221	0.0322747	0.309768	0.01	0.02	0.54	50.07	0.09	0.856716		0.486612
Sijiaying	19S-31	2.54	0.358742	0.020752	0.328021	0.02	0.01	0.16	36.03	0.12	0.873471		0.357308
Sijiaying	19S-32	2.54	0.306797	0.020752	0.311817	0.01	0.01	0.27	41.98	0.07	0.869902		0.300891
Sijiaying	19S-33	2.54	0.26033	0.0376537	0.308661	0.01	0.02	0.19	49.16	0.09	0.940459		0.254151
Sijiaying	19S-34	2.54	0.49135	0.0479162	0.318121	0.01	0.02	0.32	49.07	0.09	0.966602		0.498145
Sijiaying	19S-35	2.54	0.251421	0.0274046	0.453108	0.02	0.04	0.22	43.79	0.08	0.909041		0.246284
Sijiaying	19S-38	2.54	0.260509	0.0203265	0.347634	0.14	0.02	0.41	45.39	0.1	0.888728		0.248186
Sijiaying	19S-39	2.54	0.424155	0.0271102	0.508882	0.06	0.01	0.57	40.9	0.1	0.894619		0.426172
Sijiaying	19S-40	2.54	1.51544	0.0236644	0.808762	1.01	0.02	0.87	38.58	0.11	0.944138		1.60462
Dong'anshan	16TDA-9A	2.54	1.06798	0.0267604	0.829326	0.51	0.02	0.05	47.01	0.01	0.874907	1.60 based on average δ98Mo value of six samples excluding 16TDA-9A, 16TDA-5D, 16TDA-4A, and 16TDA-2F	1.07077
Dong'anshan	16TDA-5E	2.54	0.398975	0.0275587	0.109529	0.01	0.01	0.08	50.02	0.34	0.859772		0.39892
Dong'anshan	16TDA-5D	2.54	0.673264	0.0258644	0.157815	0.32	0.02	0.05	32.59	0.17	0.879618		0.679355
Dong'anshan	16TDA-5A	2.54	0.55002	0.0204349	0.094115	0.01	0.01	0.07	51.77	0.09	0.887623		0.558113
Dong'anshan	16TDA-4A	2.54	0.692734	0.0264672	0.275665	0.43	0.02	0.38	44.72	0.15	0.946941		0.723418
Dong'anshan	16TDA-3C	2.54	0.444158	0.0352811	0.082615	0.01	0.02	0.13	38.32	0.23	0.857385		0.449521
Dong'anshan	16TDA-3B	2.54	0.410064	0.0269365	0.103514	0.01	0.01	0.14	54.33	0.17	0.889697		0.411097
Dong'anshan	16TDA-2J	2.54	0.499825	0.0296768	0.119636	0.01	0.01	0.65	42.83	0.04	0.906481		0.559447
Dong'anshan	16TDA-2G	2.54	0.532236	0.033337	0.070898	0.01	0.01	0.39	56.79	0.07	0.972657		0.6128
Dong'anshan	16TDA-2F	2.54	0.877698	0.0269122	0.281315	0.45	0.02	0.17	51.01	0.16	0.890957		0.898428
*Data are from Wang et al. (2024) and rAnalysis replicate refers to Mo isotope analyses on the same sample solution
