# Supplementary material for: A heavy molybdenum reservoir in Neoarchean seawater tracks extensive iron oxidation
Source: Research Square preprint supplement (doi:10.21203/rs.3.rs-7181523/v1), 2025-07-24
Supplement: Supplementary file 3 [file d5548c530f39f90337e6063e.xlsx]

## Sheet: Sheet1
Table S1. Compilation of previously published Mo isotope data of shales, carbonates, and banded iron formations deposited from Paleoarchean to Paleoproterozoic
Reference	Sample	Sample code	Age (Ga)	reported uncertainty (‰, various statistics)	δ98/95Mo3134+0.25 (‰)	Mo (ppm)
Shale
Arnold et al., 2004†
	Euxinic sediment, Black shales, Wollogorang Fm., Tawallah Gp.	9710-8280 mean	1.7	0.2	0.495	52
		9710-8281 mean	1.7	0.13	0.87	3.72
Siebert et al., 2005
	Black Shale, Silverton Fm., Transvaal SGp.	BB 11/37	2.2	0.24	0.05	3.72
	Black Shale, Boshoek Fm., Transvaal SGp.	LBA 1/177	2.2	0.24	0.11	0.57
	Black Shale, Timeball Hill Fm. , Transvaal SGp.	BB 11:18	2.3	0.24	0.18	0.71
	Black Shale, Timeball Hill Fm. , Transvaal SGp.	LBA 1:16	2.3	0.24	0.34	0.56
	Black Shale (base Black Reef), Transvaal SGp.	99/02	2.5	0.16	0.61	2.07
	Black Shale (base Black Reef), Transvaal SGp.	99/03	2.5	0.16	0.47	1
	Silty Black Shale, Ventersdorp SGp.	99/019	2.6	0.1	0.3	0.1
	Black Shale, Belingwe Greenstone Belt	CHS-6	2.6	0.24	0.22	0.61
	Black Carbonaceous Shale, Belingwe Greenstone Belt	BES-63	2.7	0.06	0.42	6.01
	Black Shale, Pyrite, Belingwe Greenstone Belt	BES-21	2.7	0.03	0.35	1.14
	Black Carbonaceous Shale, Belingwe Greenstone Belt	BES-54	2.7	0.03	0.89	2.2
	Black Shale, Pyrite, Belingwe Greenstone Belt	BES-6	2.7	0.16	0.84	2.5
	Black Shale, Carbonate Layers, Belingwe Greenstone Belt	BES-7	2.7	0.16	0.79	2.51
	Black Shale, Pyrite, Witwatersrand SGp.	99/015	2.95	0.24	0.28	0.92
	Carbonaceous Black Shale, Barberton Greenstone Belt, Moodies Gp.	01/018	3.15	0.07	0.13	1.29
	Gray to Black Mudstone, Barberton Greenstone Belt, Fig Tree Gp.	99/029	3.23	0.07	0.2	1.37
	Black Shale, Barberton Greenstone Belt, Fig Tree Gp.	99/038	3.23	0.06	0.07	1.33
	Black Shale, Barberton Greenstone Belt, Fig Tree Gp.	99/039	3.23	0.11	0.15	1.3
Wille et al., 2007
	Black shales, Ghaap Gp., Transvaal SGp.	185.16m	2.5	0.04	0.74	3.99
		190.97m	2.5	0.02	0.83	1.01
		211m	2.5	0.04	0.68	0.71
		221m	2.5	0.02	0.62	2.01
		240m	2.6	0.02	0.86	4.01
		245.75m	2.6	0.03	1.21	4.52
		245.75m	2.6	0.06	1.17	4.52
		250m	2.6	0.02	0.77	7.21
		264m	2.6	0.02	0.46	2.84
		280m	2.6	0.04	0.73	1.62
		292.2m	2.6	0.02	1.06	2.05
		302m	2.6	0.02	1.19	5.07
		317.6m	2.6	0.12	-0.02	0.79
		322.02m	2.6	0.04	1.34	5.09
		344.54m	2.6	0.02	0.1	1.92
		385m	2.6	0.02	1.72	6
		410.85m	2.6	0.04	0.96	2.79
		444m	2.6	0.04	0.6	1.37
		485m	2.6	0.04	0.39	1.47
		485.23m	2.6	0.07	0.13	1.21
		489.01m	2.6	0.02	1.16	3.91
		491.15m	2.6	0.1	0.05	0.94
		499.32m	2.6	0.1	0.36	0.88
		614.55m	2.6	0.02	1.01	5.83
		626m	2.6	0.04	0.54	6.94
		637m	2.6	0.05	0.33	1.05
		637.55m	2.6	0.06	0.45	1.2
		637.55m	2.6	0.06	0.52	1.2
		696.3m	2.6	0.02	0.01	2.47
		721.63m	2.6	0.06	0.8	4.7
		733.4m	2.6	0.08	1.03	1.91
		738.95m	2.6	0.12	0.98	1.12
		743.1m	2.6	0.12	0.48	2.59
		798.5m	2.6	0.16	0.18	4.11
		830.9m	2.6	0.04	0.59	2.86
		871.83m	2.6	0.09	0.54	1.82
		890.7m	2.6	0.03	0.54	2.68
		892.4m	2.6	0.06	-0.27	0.27
		965.1m	2.6	0.06	-0.24	0.39
		970.75m	2.6	0.08	0.73	2.42
		980.121m	2.6	0.09	0.53	1.64
		1019.9m	2.6	0.05	0.54	1.94
		1022.12m	2.6	0.03	0.52	2.26
		1047.7m	2.6	0.04	0.5	8.32
		1049.1m	2.6	0.07	0.37	1.34
		1079.9m	2.6	0.1	0.11	0.98
		1087.8m	2.6	0.04	0.34	0.94
		1150.9m	2.6	0.03	0.05	1.41
		1200.95m	2.64	0.04	0.16	1.68
		1262.1m	2.64	0.07	0.18	1.01
	Unmineralized sediments, Fig Tree Gp.	553.5	3.23	0.06	0.18	1.957
		385.95	3.23	0.06	0.13	1.829
		496.3	3.23	0.05	0.647	2.064
		284.5	3.23	0.07	0.15	2.227
		603	3.23	0.05	0.18	1.388
		585	3.23	0.12	-0.01	1.053
		266	3.23	0.06	0.24	2.363
		233.6	3.23	0.07	0.33	1.629
		151.5	3.23	0.04	0.06	1.98
		435.75	3.23	0.04	0.23	2.908
		435.75	3.23	0.14	0.09	1.3
	Black shales, Timeball Hill Fm., Pretoria Gp.	EBA1/14	2.45	0.04	0.35	1.78
		EBA1/16	2.45	0.24	-0.34	0.56
		BB11/41	2.45	0.04	0.16	0.96
		BB11/37	2.45	0.03	-0.13	1.7
	Black shales, Boshoek Fm., Pretoria Gp.	EBA1/177	2.45	0.8	0.35	1.78
	Black shales, Silverton Fm., Pretoria Gp.	BB11/18	2.15	0.07	-0.087	0.75
		LES1/42	2.15	0.03	-0.27	0.16
		LES1/60	2.15	0.05	-0.15	0.44
Duan et al., 2010
	Organic-rich marl interval	109m	2.5	0.07	1.12	8.04
		112.52m	2.5	0.13	0.9	6.79
		113.46m	2.5	0.05	1.33	11.46
		117.31m	2.5	0.11	1.15	2.83
	Upper Black Shale Unit S1, Mt. McRae Shale	126.15m	2.5	0.18	0.95	7.36
		131.6m	2.5	0.07	1.49	13.78
		133.97m	2.5	0.11	1.26	19.4
		135.58m	2.5	0.1	1.02	8.35
		138.74m	2.5	0.04	1.11	16.77
		139.01m	2.5	0.09	1.23	18.98
		139.97m	2.5	0.12	1.14	25.01
		140.25m	2.5	0.05	1.23	22.59
		140.5m	2.5	0.08	1.21	29.07
		140.95m	2.5	0.1	1.32	30.5
		141.47m	2.5	0.09	1.33	21.94
		141.72m	2.5	0.07	1.03	18.64
		142.08m	2.5	0.16	0.87	19.05
		143.45m	2.5	0.11	1.31	41.35
		145.61m	2.5	0.15	1.74	40.05
		146.45m	2.5	0.05	1.51	40.3
		147.3m	2.5	0.1	1.36	27.09
		148.27m	2.5	0.13	1.27	20.18
		149.3m	2.5	0.05	1.68	37.08
		150.24m	2.5	0.15	1.35	16.53
		153.08m	2.5	0.12	1.3	8.65
	Lower black shale unit S2, Mt. McRae Shale	175.51m	2.5	0.09	0.87	3.26
		177.1m	2.5	0.11	0.88	3.15
		178.83m	2.5	0.17	0.95	3.44
		180.33m	2.5	0.1	1	2.94
		182.5m	2.5	0.11	1.07	2.52
		187.46m	2.5	0.08	0.87	3.17
Kendall et al., 2011
	Black shales, Euxinic interval, Rove Fm.	R40	1.85	0.13	0.34	32
		R39	1.85	0.14	1.29	20
		R38	1.85	0.1	1.27	10.5
		R35	1.85	0.12	1.11	24
		R34	1.85	0.09	1.13	20
		R33	1.85	0.16	1	32
		R32	1.85	0.17	0.49	35
		R31	1.85	0.16	0.91	42
		R30	1.85	0.07	0.94	24
		R29	1.85	0.09	1.13	29
	Black shales, Transitional interval, Rove Fm.	R27	1.85	0.07	0.67	52
		R26P	1.85	0.03	0.55	52
		R260	1.85	0.05	0.6	42
		R26N	1.85	0.08	0.41	42
		R26J	1.85	0.01	0.2	15.4
		R26I	1.85	0.17	0.21	12.7
		R26H	1.85	0.04	0.23	13.2
		R26Hbis	1.85	0.19	0.24	13.2
		R26F	1.85	0.11	0.25	12.7
		R26E	1.85	0.1	0.16	11.2
		R26D	1.85	0.15	0.29	7.1
		R26C	1.85	0.15	0.32	15.2
		R26B	1.85	0.01	0.2	25
		R24	1.85	0.07	-0.17	12.5
		R23	1.85	0.07	-0.06	6.7
		R23bis	1.85	0.02	-0.01	6.7
		R22	1.85	0.04	-0.04	29
		R21	1.85	0.15	0.21	26
		R20	1.85	0.02	-0.21	34
		R19	1.85	0.1	-0.23	23
		R18	1.85	0.06	-0.01	7.9
		R17	1.85	0.01	0.07	36
		R16	1.85	0.15	0.05	21
		R15A	1.85	0.01	0.5	7.8
		R15Abis	1.85	0.01	0.5	7.9
		R14	1.85	0.21	0.5	13.9
		R12	1.85	0.11	0.49	3.9
		R10	1.85	0.07	0.11	6.5
		R9	1.85	0.19	-0.01	14.1
		R8	1.85	0.08	-0.14	14.3
Asael et al., 2013
	Black shales, Siltstones, Zaonega Fm. Shunga Event	3109562	2.05	0.09	0	8.1
		3109566	2.05	0.12	0.03	6.5
		3109572	2.05	0.05	-0.04	43.8
		3109640	2.05	0.05	-0.04	46.6
		3109576	2.05	0.05	-0.04	72.3
		3109578	2.05	0.05	-0.04	39.5
		3109580	2.05	0.05	-0.04	23.1
		3109582	2.05	0.09	0	10.7
		3109594	2.05	0.08	-0.01	15.5
		3109596	2.05	0.06	-0.03	14.1
		3109598	2.05	0.08	-0.01	23
		3109600	2.05	0.06	-0.03	38.9
		3109602	2.05	0.06	-0.03	33.6
		3109604	2.05	0.05	-0.04	39.5
		3109606	2.05	0.05	-0.04	33
		3109608	2.05	0.06	-0.03	40.7
		3109612	2.05	0.1	0.01	11.2
		3109614	2.05	0.06	-0.03	12
		3109620	2.05	0.06	-0.03	12
		3109622	2.05	0.11	0.02	7.7
		3109628	2.05	0.11	0.02	4.1
		3109638	2.05	0.13	0.04	7.2
		3109658	2.05	0.06	-0.03	15.2
		3109668	2.05	0.06	-0.03	12.3
		3109674	2.05	0.12	0.03	4.1
		3109676	2.05	0.11	0.02	5.2
		3109688	2.05	0.14	0.05	7.1
		3109748	2.05	0.16	0.07	2
		3109706	2.05	0.07	-0.02	10.3
		3109708	2.05	0.1	0.01	5.1
		3109712	2.05	0.48	0.39	N.D.
		3109722	2.05	0.32	0.23	N.D.
		3109724	2.05	0.18	0.09	1.7
		3109726	2.05	0.1	0.01	5.1
		3109732	2.05	0.06	-0.03	11.9
		3109736	2.05	0.09	0	5.1
		3109738	2.05	0.1	0.01	6.5
		3109740	2.05	0.11	0.02	7
		3109744	2.05	0.1	0.01	9.7
		3109746	2.05	0.1	0.01	10.5
		3109752	2.05	0.05	-0.04	25.5
		3109758	2.05	0.06	-0.03	17.4
		3109760	2.05	0.05	-0.04	21.6
		3109764	2.05	0.07	-0.02	15.5
		3109778	2.05	0.12	0.03	4.6
Wille et al., 2013
	Black shales, ABDP #2, Duffer Fm., Warrawoona Gp.	194593	3.47	0.05	0.46	3.6
		194594	3.47	0.02	0.51	3.1
		194595	3.47	0.02	0.29	3.9
		194596	3.47	0.02	0.41	2.4
		194597	3.47	0.02	0.24	2.6
	Black shales, ABDP #5, Nullagine Gp., De Grey SGp.	194598	2.94	0.02	0.51	1.5
		194599	2.94	0.02	0.59	1.5
		194600	2.94	0.02	0.46	1.6
		197401	2.94	0.02	0.44	1.5
		197402	2.94	0.02	0.5	1.5
	Black shales, ABDP #6, Mt. Roe Basalt, Fortescue Gp., Mount Bruce SGp.	194587	2.77	0.02	0.59	2.5
		194588	2.77	0.02	0.41	2.7
		194589	2.77	0.02	0.24	3.4
		194590	2.77	0.02	0.52	4.5
		194591	2.77	0.02	0.27	3.6
	Black shales, ABDP #3, Hardey Fm., Fortescue Gp., Mt. Bruce SGp.	197403	2.76	0.01	0.5	3.4
		197404	2.76	0.02	0.5	2.9
		197405	2.76	0.02	0.43	2.8
		197406	2.76	0.02	0.55	3.6
Kurzweil et al. 2015
	Black shales, Core ABDP9, Mt. McRae Fm., Hamersley Gp.	114.4m	2.5	0.02	1.56	4
		132.7m	2.5	0.01	1.62	13.7
		176.7m	2.5	0.02	1.22	3.5
	Black shale, Core ABDP9, Mt. Sylvia Fm., Hamersley Gp.	218.65m	2.5	0.02	1.35	4.5
	Black shales, Core ABDP9, Wittenoom Fm., Hamersley Gp.	239.5m	2.54	0.03	0.83	2.1
		259.38m	2.54	0.03	1.14	2.5
		316m	2.54	0.02	0.86	4.4
		340m	2.54	0.02	0.87	3.8
	Black shales, Core Millstream9, Wittenoom Fm., Hamersley Gp.	205m	2.54	0.02	0.77	4.1
		205.5m	2.54	0.01	1.09	4.9
		217m	2.54	0.03	1.04	6.2
	Black shales, Core ABDP9, Marra Mamba Fm., Hamersley Gp.	229.3m	2.6	0.02	0.84	2.8
Ossa Ossa et al. 2018
	Shale from the shallow-water setting, Ntombe Fm., White Mfolozi Inler, Pongola SGr.	TSB07-26-19.90	2.95	0.01	-0.395	0.3††
		TSB07-26-35.54	2.95	0.011	0.411	1.8††
		TSB07-26-46.53	2.95	0.014	-0.233	0.4††
		TSB07-26-54.46	2.95	0.013	-0.071	0.4††
		TSB07-26-56.43	2.95	0.013	0.406	0.6††
		TSB07-26-61.55	2.95	0.014	0.388	1††
		TSB07-26-66.10	2.95	0.014	0.294	1.1††
		TSB07-26-67.17	2.95	0.012	-0.455	2††
		TSB07-26-71.38	2.95	0.01	0.313	0.6††
		TSB07-26-71.92	2.95	0.015	0.316	1††
		TSB07-26-90.85	2.95	0.013	0.242	1††
	Shale from the shallow-water setting, Sinqeni Fm., White Mfolozi Inler, Pongola SGr.	TSB07-26-164.20	2.95	0.016	-0.335	0.2††
		TSB07-26-165.20	2.95	0.013	0.261	0.7††
		TSB07-26-170.10	2.95	0.011	0.225	0.7††
		TSB07-26-171.80	2.95	0.013	0.093	1.8††
	Shale from the deep-water setting, Thalu Fm., Nongoma area, Pongola SGr.	PNG2-519.90	2.95	0.013	0.46	0.4††
		PNG2-550.50	2.95	0.012	0.392	0.5††
		PNG2-905.00	2.95	0.012	0.561	0.3††
		PNG2-989.9	2.95	0.014	0.381	0.8††
	Shale from the deep-water setting, Ntombe Fm., Nongoma area, Pongola SGr.	PNG2-1246.9	2.95	0.011	0.371	1.8††
		PNG2-1490.80	2.95	0.012	0.54	1.8††
		PNG2-1910.50	2.95	0.014	0.338	1.8††
		PNG2-2236.50	2.95	0.013	0.375	1.8††
	Shale from the deep-water setting, Sinqeni Fm., Nongoma area, Pongola SGr.	PNG2-2808.20	2.95	0.014	0.452	1.8††
Asael et al., 2018
	Shale, Zaonega Fm.	16.6	2	0.11	0.57	1.6
		33.7	2	0.12	0.78	15
		36.5	2	0.13	0.64	44.3
		38.4	2	0.11	0.5	26
		54.9	2	0.1	0.67	180.2
		57.3	2	0.1	1.11	43.7
		61.5	2	0.12	0.32	35.2
		70.6	2	0.11	1.83	18
		72.6	2	0.12	0.72	13.4
		75.2	2	0.09	0.68	5.7
		80.3	2	0.1	0.77	7.4
		86.9	2	0.09	0.58	40.2
		95.3	2	0.12	0.38	107.3
		96.9	2	0.13	0.75	41.8
		97	2	0.13	0.81	15.1
		98.8	2	0.13	0.93	3.2
		101.5	2	0.12	0.78	2.1
		175.2	2	0.12	0.54	13.6
		176	2	0.08	0.67	17.7
		179.4	2	0.1	0.63	6.4
		180.7	2	0.11	0.76	4.3
		194.8	2	0.09	1.11	6.5
		204.3	2	0.12	0.54	6.8
		16	2	0.09	0.46	35.2
		78	2	0.05	0.72	24.2
		83	2	0.05	1.01	13.2
		96	2	0.1	0.23	27.2
		100	2	0.1	0.35	14.5
		137	2	0.05	0.16	13.9
		156	2	0.08	0.94	13.2
		184	2	0.11	0.92	70.7
		199	2	0.05	0.59	27.4
		245	2	0.11	1.2	8.2
		292.5	2	0.11	1.45	2
		293.2	2	0.13	1.41	1.7
		295.6	2	0.1	1.17	1.7
	Shale, Sengoma Argillite Fm.	142.8	2.15	0.05	0.24	2.6
		156.8	2.15	0.06	2.21	1.9
		171.5	2.15	0.05	1.13	1.9
		173.7	2.15	0.04	1.13	2.2
		177.7	2.15	0.06	1.19	2
		181.3	2.15	0.05	1.52	2.1
		186.6	2.15	0.05	0.7	36.6
		200.7	2.15	0.04	1.49	10.9
		202.5	2.15	0.05	1.6	6.6
		205.3	2.15	0.04	1.7	8.7
		209	2.15	0.04	1.51	8.8
		212.7	2.15	0.04	0.82	4.8
		216.8	2.15	0.06	0.71	1.4
		238	2.15	0.06	0	1.5
		286.6	2.15	0.04	1.25	2
	Shale, Timeball Hill Fm.	1327.7	2.32	0.14	0.03	8.9
		1327.8	2.32	0.12	-0.37	21.5
		1327.9	2.32	0.14	0.45	7.6
		1328.9	2.32	0.12	-0.13	6.9
		1338.1	2.32	0.04	-0.08	67.7
		1338.1	2.32	0.04	-0.02	14.9
		1338.2	2.32	0.04	1.25	54.6
		1338.2	2.32	0.04	0.36	20.9
		1339	2.32	0.06	-0.34	4.3
		1343	2.32	0.04	0.71	4.4
		1346.2	2.32	0.04	-0.38	5.5
Ossa Ossa et al., 2018b
	Shale, Fracevillian Gr.,	LST01-34.35 (S)	2.1		0.6	5.4
		LST01-36.1 (S)	2.1		0.7	3.2
		LST01-37.4 (S)	2.1		0.4	4.1
		LST01-38.5 (S)	2.1		0.6	2.8
		LST01-42.3 (S)	2.1		0.8	0.8
		SOCOBA-B (S-c)	2.1		-1.9	1.4
		POUP-B	2.1		-0.4	5.5
		POUB-A	2.1		-0.3	29
		CM2 (S-c)	2.1		0.1	0.4
		CM1 (S-c)	2.1		0.4	0.6
		B8-04 (S-c)	2.1		0.5	0.4
		MG2 (S-c)	2.1		-0.1	0.3
		BA30B-97.2 (S)	2.1		-0.7	1.2
		OK12B (S)	2.1		-0.6	47
Ostrander et al., 2019
	Mt. McRae Shale	126.15	2.5	0.18	0.98	7.4
		126.52	2.5	0.09	1.27	8.67509
		126.74	2.5	0.09	1.14234	6.63235
		127.03	2.5			8.84213
		127.61	2.5			9.42896
		127.79	2.5			11.9976
		127.98	2.5	0.09	1.38099	12.6079
		128.34	2.5			8.67231
		128.54	2.5			7.99477
		128.71	2.5			9.76263
		128.84	2.5	0.09	1.28	8.8765
		129.01	2.5			9.2
		129.15	2.5	0.09	1.32462	10.0326
		129.36	2.5	0.09	1.26	8.83739
		129.58	2.5			8.9322
		129.85	2.5	0.09	1.33271	12.4504
		130.39	2.5			10.0965
		130.57	2.5			6.45024
		130.76	2.5			6
		131.6	2.5	0.15	1.52	13.8
		132.13	2.5			14.7
		132.43	2.5	0.09	1.27	17.2465
		133.23	2.5		1.44	17.8589
		133.44	2.5	0.09	1.5297	14.2279
		133.6	2.5	0.09	1.44608	14.7072
		133.79	2.5	0.09	1.59	19.3482
		133.97	2.5	0.15	1.29	19.4
		134.17	2.5	0.09	1.33789	16.9334
		135.58	2.5	0.15	1.05	8.3
		135.8	2.5	0.09	1.10298	14.0955
		136	2.5	0.09	1.29063	11.6906
		136.28	2.5	0.09	1.3047	12.6928
		136.51	2.5	0.09	1.22979	16.4211
		136.67	2.5			17.3
		136.94	2.5			17.5
		137.2	2.5	0.09	1.4533	19.2735
		137.46	2.5	0.09	1.32842	19.1978
		137.68	2.5			11.9
		137.8	2.5	0.09	1.3545	17.2124
		137.96	2.5			19.1
		138.14	2.5	0.09	1.37566	17.7696
		138.38	2.5			19
		138.52	2.5	0.09	1.31659	15.6252
		138.74	2.5	0.15	1.14	16.8
		138.84	2.5	0.09	1.21759	14.3331
		139.01	2.5	0.15	1.26	19
		139.18	2.5	0.09	1.05946	14.9814
		139.52	2.5	0.09	1.29295	19.1306
		139.9	2.5	0.09	1.35428	18.3607
		139.97	2.5	0.15	1.17	25
		140.25	2.5	0.15	1.26	22.6
		140.34	2.5	0.09	1.12326	20.0919
		140.5	2.5	0.15	1.24	29.1
		140.67	2.5	0.09	1.2608	19.424
		140.95	2.5	0.15	1.35	30.5
		141.05	2.5	0.09	1.3476	20.5092
		141.17	2.5			20.4
		141.47	2.5	0.15	1.36	21.9
		141.59	2.5	0.09	1.28251	18.11
		141.72	2.5	0.15	1.06	18.6
		141.94	2.5	0.09	1.07515	14.0576
		142.08	2.5	0.16	0.9	19.1
		142.2	2.5	0.09	1.11689	17.5728
		142.41	2.5	0.09	1.09319	19.0547
		142.71	2.5	0.09	1.23375	18.3171
		143.12	2.5	0.09	1.20799	16.5454
		143.26	2.5	0.09	1.22539	17.9864
		143.45	2.5	0.15	1.34	41.4
		143.55	2.5	0.09	1.31325	29.1311
		143.66	2.5	0.09	1.26321	20.5411
		143.8	2.5	0.09	1.25017	29.213
		143.92	2.5	0.09	1.23492	39.7572
		143.98	2.5	0.09	1.16551	23.5987
		144.08	2.5	0.09	1.29676	16.9241
		144.16	2.5	0.09	1.21725	20.4892
		144.26	2.5	0.09	1.28068	21.5009
		144.36	2.5			33.7
		145.16	2.5	0.09	1.43617	48.4467
		145.22	2.5	0.09	1.40145	48.8804
		145.32	2.5	0.09	1.44874	36.0597
		145.41	2.5	0.09	1.53286	37.7895
		145.53	2.5	0.09	1.53805	30.1065
		145.61	2.5	0.15	1.77	40.1
		145.74	2.5	0.09	1.56109	31.8995
		146.02	2.5	0.09	1.33445	23.4276
		146.08	2.5	0.09	1.32748	29.4147
		146.17	2.5	0.09	1.47451	29.5353
		146.26	2.5	0.09	1.38949	26.7884
		146.39	2.5	0.09	1.45964	25.2358
		146.45	2.5	0.15	1.54	40.3
		146.58	2.5	0.09	1.41608	29.3128
		146.72	2.5	0.09	1.36	19.4962
		146.81	2.5	0.09	1.33163	20.014
		146.88	2.5	0.09	1.28192	26.4188
		146.99	2.5	0.11	1.36744	21.9862
		147.1	2.5	0.09	1.30353	28.5088
		147.2	2.5	0.09	1.49595	26.3151
		147.3	2.5	0.15	1.39	27.1
		147.54	2.5	0.09	1.31965	20.6033
		147.64	2.5	0.09	1.25582	16.7461
		147.75	2.5	0.09	1.47532	30.1681
		147.9	2.5	0.09	1.43026	24.0906
		147.98	2.5	0.09	1.40878	29.7367
		148.07	2.5	0.09	1.50019	31.3889
		148.15	2.5	0.09	1.50646	35.4955
		148.27	2.5	0.15	1.3	20.2
		148.32	2.5			26.5097
		148.59	2.5	0.09	1.44	15.6718
		148.75	2.5	0.09	1.39773	19.9818
		148.87	2.5	0.09	1.20515	25.2869
		148.96	2.5	0.09	1.29263	26.9546
		149.14	2.5	0.09	1.45462	20.8019
		149.3	2.5	0.15	1.71	37.1
		149.5	2.5	0.09	1.41	17.64
		149.78	2.5	0.09	1.46031	21.6366
		149.88	2.5	0.09	1.43919	19.2411
		149.99	2.5	0.09	1.44755	15.0281
		150.24	2.5	0.15	1.38	16.5
		150.4	2.5			13.3278
		150.74	2.5	0.09	1.19821	15.5423
		150.99	2.5			16.177
		151.14	2.5	0.09	1.33	12.7617
		151.56	2.5			7.09686
		151.86	2.5			6.58216
		152.08	2.5	0.15	1.33	7.3
		152.25	2.5	0.09	1.19182	6.10157
		152.42	2.5	0.09	0.899354	6.30788
		152.65	2.5			8.7
		152.84	2.5			7.38194
		153.06	2.5	0.09	0.841324	5.5585
		153.18	2.5			6.7
		157.8	2.5	0.18	1.16	8
		163.95	2.5	0.15	1	5.1
		168.36	2.5	0.17	0.91	3.3
		175.51	2.5	0.15	0.9	3.3
		177.1	2.5	0.15	0.91	3.1
		178.61	2.5			3.2
		178.83	2.5	0.17	0.98	3.4
		180.33	2.5	0.15	1.03	2.9
		181.2	2.5			2
		182.5	2.5	0.15	1.1	2.5
		183.65	2.5			2.4
		185.43	2.5			1.8
		187.46	2.5	0.15	0.9	3.2
		188.01	2.5			4.6
		188.87	2.5			7.7
Cabral et al., 2019
	Morro da Mina, Mn-rich graphitic schist	MM-22	1.965		-0.93	11.2
		MM-23c	1.965		-0.44	35.2
		MM-24a	1.965			13
		MM-24b	1.965		-1.14	11.2
	Morro da Mina, Graphitic schist	MM-20	1.965		0.8	14
		MM-21	1.965		0.05	15
		MM-23a	1.965		0.07	9.2
		MM-23b	1.965		0.31	5.2
		MM-28	1.965		-0.17	1.8
Ostrander et al., 2020
	Shale, Jeerinah Fm.	66.03	2.66	0.0322949	0.476528	2.84578
		67.17	2.66	0.0541145	0.377668	3.08657
		68.22	2.66	0.025516	1.01719	4.11699
		68.59	2.66			3.05071
		68.92	2.66	0.0327811	0.446965	2.6771
		70.55	2.66			2.0599
		70.62	2.66			2.09153
		70.82	2.66			2.03385
		71.05	2.66	0.0465023	0.581036	2.64406
		71.12	2.66			2.83116
		71.22	2.66			2.91387
		71.44	2.66			2.72115
		71.93	2.66			2.41432
		72.44	2.66	0.0572724	0.544091	2.51303
		74.1	2.66	0.0135873	-0.254995	2.41467
		76.99	2.66	0.0468152	0.248947	1.7589
		77.52	2.66			2.70288
		78.56	2.66	0.0154081	0.518989	1.76354
		79.36	2.66	0.0580243	0.59359	2.45363
		79.78	2.66			2.5323
		80.78	2.66			2.46308
		82.19	2.66			2.70089
		83.23	2.66	0.0612661	0.520846	2.9462
		83.93	2.66			2.68375
		84.56	2.66			2.60587
		85.4	2.66			2.6261
		86.54	2.66	0.0347582	0.442585	2.76775
		87.7	2.66			1.5067
		88.22	2.66			1.41756
		88.78	2.66			2.12083
		89.93	2.66	0.0502042	0.749198	2.12018
		91.67	2.66			2.00092
		92.83	2.66	0.120298	0.497352	2.4856
		93.88	2.66			2.65906
		95.49	2.66			1.77967
		95.92	2.66			2.1464
		97.13	2.66	0.0555906	0.625074	2.03884
		97.55	2.66			4.86708
		101.77	2.66	0.0372422	0.250553	1.62264
		104.5	2.66			1.7371
		104.92	2.66	0.0788741	0.367424	6.16503
		105.4	2.66			1.71071
		106.82	2.66	0.123344	0.557946	4.82875
		107.18	2.66			3.38091
		108.39	2.66			2.80782
		109.06	2.66			2.11648
		109.9	2.66	0.0274493	0.45048	1.23828
		109.9	2.66			1.38042
		111.48	2.66			1.33577
		111.6	2.66	0.0964219	0.410991	1.38155
		114.59	2.66			1.58638
		115.35	2.66	0.0318926	0.388721	2.06222
		115.83	2.66			1.92517
		116.39	2.66			1.63956
		118.32	2.66	0.0219656	0.435841	2.58488
		120.4	2.66	0.0971875	0.734522	3.42325
		121.08	2.66			3.58867
		121.47	2.66			3.5511
		123.01	2.66	0.033633	0.471713	2.80202
		123.22	2.66			3.11042
		124.52	2.66			4.04782
		125.8	2.66	0.0935797	0.704802	4.28102
		127.17	2.66			4.52899
		127.83	2.66			3.98608
		128.7	2.66			4.20252
		129.65	2.66			4.7184
		130.17	2.66	0.0314522	0.820533	3.5783
		131.31	2.66			4.48673
		131.98	2.66			3.81679
		132.78	2.66			6.08979
		133.37	2.66			4.25182
		134.13	2.66			5.43659
		134.81	2.66	0.0621198	0.441071	6.84069
		135.86	2.66			4.17126
		137.53	2.66			4.89776
		138.53	2.66	0.0350664	0.61505	5.27922
		138.99	2.66			4.73865
		139.55	2.66			5.20494
		140.36	2.66	0.0168633	0.751119	5.63944
		141.28	2.66			5.99834
		141.75	2.66			5.10291
		142.04	2.66			5.06086
		142.11	2.66	0.0462863	0.778743	5.1797
		142.31	2.66			4.89223
		142.53	2.66			4.74441
		142.75	2.66			4.91593
		142.99	2.66			5.23881
		144.72	2.66	0.0248625	0.659447	4.64194
		145.77	2.66			6.38298
		146.29	2.66	0.024721	0.647619	4.82027
		149	2.66			3.70206
		150.06	2.66			4.10192
		151.23	2.66	0.0866617	0.583366	4.08503
		151.96	2.66			4.85003
		152.84	2.66			3.87969
		153.81	2.66			3.71003
		154.46	2.66			3.92495
		154.9	2.66			4.09577
		155.75	2.66			4.25477
		156.84	2.66			3.47059
		158.26	2.66			5.42491
		159.56	2.66			4.73788
		160.33	2.66			4.26537
		160.88	2.66			4.75829
		161.62	2.66			4.45777
		164.12	2.66	0.0633577	0.434891	1.97557
		165	2.66			3.2343
		165.74	2.66			1.86893
		169.62	2.66			1.2967
		171.56	2.66			1.608
		173.76	2.66			1.45084
		179.11	2.66			1.98089
		179.77	2.66			1.85212
		181.23	2.66			1.18897
		181.53	2.66			1.79689
		183.36	2.66			1.16112
		185.71	2.66	0.0403132	0.370612	1.24457
		189.55	2.66			1.19085
		193.27	2.66			0.973853
		194.39	2.66			1.13986
		198.32	2.66			1.67925
		200.58	2.66			1.28363
		204.37	2.66	0.0839056	0.339374	1.41702
		207.88	2.66			1.13498
		211.54	2.66			1.07265
		213.4	2.66			1.5173
		299.24	2.66			1.4032
		300.43	2.66			1.35234
		301.07	2.66			1.75338
		302.11	2.66			2.41571
		302.65	2.66			3.90372
		303.88	2.66			2.73773
		304.25	2.66	0.0479007	0.423323	1.56422
		305.05	2.66			2.11014
		306.05	2.66			2.43122
		307.17	2.66			1.69937
		307.64	2.66			2.26464
		309.12	2.66			2.41873
		309.8	2.66			2.28825
		310.51	2.66			2.31517
		311.15	2.66	0.0473443	0.387669	1.85705
		312.03	2.66			1.9157
		313.69	2.66			1.44852
		315.67	2.66			1.42272
		316.66	2.66			0.172265
		317.9	2.66			2.02188
		318.44	2.66			1.00038
		319.45	2.66			1.19848
		319.89	2.66	0.0531942	0.374208	1.79607
		321.01	2.66			1.29552
		322.31	2.66	0.050241	0.646709	1.68648
		323.06	2.66			1.33047
		324.23	2.66	0.0704341	0.433479	2.41324
		324.85	2.66			1.41002
		325.73	2.66	0.0573754	0.398872	3.28883
		326.73	2.66			1.73346
		328.46	2.66			1.10583
		328.97	2.66			2.15607
		330.25	2.66			1.26552
		330.6	2.66	0.0332762	0.621705	1.77965
		330.9	2.66			10.2599
		332	2.66			0.705867
		332.52	2.66			0.933877
		333.57	2.66			0.730312
		334.13	2.66	0.0193973	0.386396	1.21084
		334.97	2.66			0.410399
		336.44	2.66			0.871491
		337.54	2.66	0.0154094	0.578018	1.18872
		338.39	2.66			1.20761
		338.85	2.66			1.32724
		340.03	2.66			2.30297
		341.74	2.66			1.53092
		342.74	2.66			2.92816
		343.2	2.66	0.0346692	0.41246	1.57434
		344.18	2.66			2.62988
		344.99	2.66			3.00633
		346.03	2.66	0.0429457	0.83713	3.03826
		346.03	2.66			3.15209
		346.03	2.66			3.03632
		347	2.66			3.00309
		347.83	2.66			3.93467
		348.55	2.66			3.87193
		349.31	2.66	0.0264804	0.87926	3.57194
		350.44	2.66			2.89978
		351.81	2.66			6.54652
		352.56	2.66			5.62164
		352.82	2.66			5.11282
		353.66	2.66	0.0374975	0.916806	4.4112
		354.66	2.66			4.25925
		355.54	2.66	0.000338101	0.945711	4.57503
		356.19	2.66			4.68586
		357.37	2.66	0.0369174	0.982346	6.9007
		358.09	2.66	0.0321304	0.894972	7.1507
		358.58	2.66			5.83929
		359.39	2.66			7.15213
		360.39	2.66			6.83037
		361.42	2.66	0.0297586	0.970997	5.73057
		362.08	2.66			5.56447
		363.04	2.66			6.24206
		364.26	2.66	0.00678162	0.917458	3.96941
		365.75	2.66			4.41609
		366.34	2.66			3.67546
		367.38	2.66	0.0208465	0.856869	3.38588
		368.14	2.66			3.07329
		369.05	2.66	0.0210269	0.850553	2.73211
		369.72	2.66			3.49151
		370.34	2.66			3.20147
		370.69	2.66			3.23403
		370.98	2.66			3.26306
		371.07	2.66			3.10835
		371.54	2.66			3.75633
		371.8	2.66			3.53768
		372.86	2.66			2.80443
		374.04	2.66			2.90048
		374.67	2.66	0.0265205	0.723957	2.78758
		375.94	2.66			3.15958
		377.05	2.66			3.04109
		377.89	2.66	0.0348164	0.685416	3.0974
		380.37	2.66	0.0290425	0.623759	2.89041
		381.43	2.66			2.81663
		382.34	2.66			2.60606
		382.76	2.66			2.0739
		384.66	2.66			1.74811
		386.28	2.66	0.0238206	0.470857	1.63839
		386.82	2.66			1.59638
		388.52	2.66			1.28326
		389.03	2.66			1.74386
		390.56	2.66			2.35807
		392.33	2.66			2.22171
		392.79	2.66	0.0508411	0.686412	2.45377
		393.54	2.66			2.30591
		394.57	2.66			2.044
		397.88	2.66			2.18722
		415.33	2.66			3.07035
		415.45	2.66			3.18979
		415.6	2.66			3.2995
		416.03	2.66			3.16878
		416.44	2.66			2.3518
		416.69	2.66			2.55976
		416.85	2.66			2.66422
		417.26	2.66			3.08181
		419.59	2.66			2.57617
		420.41	2.66			4.00197
		420.58	2.66			3.52079
		426.62	2.66			3.51719
		427	2.66			3.08766
		427.34	2.66			3.47267
		427.6	2.66			3.42415
		427.91	2.66	0.0285179	0.658326	3.13571
		428.06	2.66			3.85796
		428.16	2.66			3.16054
		430.1	2.66			4.1143
		430.19	2.66			3.47919
		430.38	2.66			3.67801
	Shale, Mt. Sylvia Fm.	193.39	2.56			2.709
		197	2.56	0.0565371	1.44197	2.239
		198.83	2.56			3.316
		199.26	2.56			2.024
		199.93	2.56			2.64
		201.68	2.56	0.0639513	0.763595	4.186
		203.98	2.56			2.394
		204.7	2.56	0.036991	0.77898	2.54
		206.73	2.56			3.285
		207.93	2.56			2.531
		208.02	2.56			3.074
		209.67	2.56	0.164018	0.95712	3.456
		218.91	2.56	0.0357136	1.19862	4.398
		220.55	2.56			2.151
		223.35	2.56			2.01
		223.93	2.56			1.81
		226.1	2.56	0.0247226	0.69443	1.186
		226.31	2.56			1.917
		227.43	2.56			1.547
		228.7	2.56	0.0470742	0.998978	3.276
	Shale, Wittenoom Fm.	231.95	2.56	0.13682	0.753385	1.812
		234.37	2.56			1.821
		235.71	2.56	0.017677	0.732784	1.921
		238.31	2.56			2.749
		239.09	2.56			2.529
		240.16	2.56			1.778
		242.2	2.56			2.165
		246.62	2.56	0.093771	0.762559	2.37
		247.06	2.56			2.1
		247.35	2.56			3.582
		249.45	2.56			2.687
		251.93	2.56			3.599
		253.17	2.56	0.0895282	0.58324	3.235
		253.51	2.56			2.926
		253.99	2.56			2.61
		257.39	2.56			2.543
		259.04	2.56	0.0216831	0.864808	3.849
		263.38	2.56			2.722
		264.29	2.56			2.49
		266.85	2.56	0.0129133	0.902394	3.654
		269.51	2.56			4.004
		272.28	2.56			3.352
		273.94	2.56	0.0630292	0.741691	3.642
		275.15	2.56			3.338
		275.9	2.56			4.255
		280.5	2.56	0.165396	0.63683	3.365
		281.75	2.56			3.837
		283.58	2.56			3.705
		284.57	2.56	0.0419341	1.02895	5.204
		287.48	2.56			3.669
		290.52	2.56			4.251
		291.68	2.56			4.37
		292.74	2.56	0.0223299	0.855614	5.16
		311.12	2.56	0.0422241	0.689438	4.076
		311.88	2.56			3.524
		313.24	2.56	0.0878464	0.694623	3.559
		313.89	2.56			3.608
		315.15	2.56			4.056
		316.56	2.56	0.0739372	0.810159	4.306
		317.53	2.56			4.542
		318.51	2.56			3.957
		320.93	2.56			3.482
		322.91	2.56	0.0688893	0.567914	3.536
		324.74	2.56			3.249
		325.51	2.56			3.686
		327.4	2.56			3.277
		328.91	2.56	0.0262626	0.611792	3.573
		335.43	2.56			3.22
		336.33	2.56	0.0551407	0.654969	3.243
		340.12	2.56	0.0448192	0.672118	3.925
		341.24	2.56			3.928
		343.08	2.56			4.162
		344.32	2.56	0.0773607	0.759133	4.172
		345.11	2.56	0.0304794	0.696061	5.049
		348.42	2.56			4.242
		350.15	2.56	0.0271336	0.869498	3.375
		351.39	2.56			4.46
		351.78	2.56			3.758
		354.12	2.56			3.743
		355.28	2.56			4.586
		358.63	2.56	0.109384	0.668867	3.52
		361.29	2.56			2.443
		364.21	2.56			4.065
		366.5	2.56			3.068
		371.95	2.56			2.686
		375.02	2.56			2.98
		379.4	2.56			1.495
		382.52	2.56			2.81
	Shale, Klein Naute Fm.	238.57	2.55	0.03	0.82	3.43824
		239.53	2.55			5.13552
		240.5	2.55			5.88952
		241.27	2.55			4.6919
		242.7	2.55			6.83075
		243.55	2.55			5.48341
		244.45	2.55	0.02	0.89	5.95828
		245.51	2.55			5.21058
		246.45	2.55	0.14	1.03	5.08124
		249.68	2.55			6.42926
		250.45	2.55			1.53537
		253.35	2.55			0.926901
		260.07	2.55	0.04	0.89	2.88337
		261	2.55			1.80416
		261.95	2.55			2.08083
		262.3	2.55			1.68497
		263.85	2.55			2.79516
		265.55	2.55			1.56519
		266.4	2.55	0.02	0.38	1.97234
		267.4	2.55			1.35259
		268.93	2.55			1.74958
		269.25	2.55			3.36444
		273	2.55			1.38971
		273.95	2.55			1.43028
		274.5	2.55	0.01	0.57	1.5121
		275.5	2.55			2.61077
		276.1	2.55			2.82111
		276.65	2.55			2.26428
		277.15	2.55			2.1412
		277.75	2.55			6.9777
		278.6	2.55	0	0.64	2.4798
		279.35	2.55			2.11155
		280.27	2.55	0.13	1.17	2.3171
		281.59	2.55			1.40714
		283.65	2.55			3.55596
		284.25	2.55			2.74262
		286.65	2.55			3.28613
		290.57	2.55			1.64122
		291.55	2.55			2.41564
		292.47	2.55			1.87501
		293.38	2.55			2.19006
		297.85	2.55			5.78251
		299.4	2.55	0.03	1.01	5.54802
		300.42	2.55			5.25236
		301.47	2.55			5.05494
		302.5	2.55	0.03	1.04	4.52948
		303.5	2.55			2.88422
		304.08	2.55			3.92124
		305.34	2.55	0.08	0.79	5.49101
		306.28	2.55	0.04	1.11	6.28591
		307.62	2.55			3.89278
		308.4	2.55	0.06	0.94	1.66049
		309.45	2.55	0.15	1.14	5.64042
		310.45	2.55			4.78447
		311.48	2.55	0.07	0.95	4.54295
		312.73	2.55	0.03	1.08	8.60783
		314.1	2.55			2.4735
		315.85	2.55	0.02	1.27	6.80954
		316.35	2.55			5.09755
		317.55	2.55	0.09	0.91	3.82257
		318.72	2.55	0.09	1.07	7.59156
		319.75	2.55	0.01	1.09	5.08317
		321.65	2.55			2.17709
		322.23	2.55			1.73093
		323.07	2.55			1.18798
		324.36	2.55			2.02889
		325.4	2.55			0.493728
		326.85	2.55			0.425043
		328.5	2.55			0.688752
		330	2.55			0.460512
		234.2	2.55			6.05156
		235.19	2.55			4.83988
		236.03	2.55			4.31181
		241.94	2.55			13.304
		263.74	2.55	0.01	1.03	3.60646
		264.43	2.55			6.47202
		264.92	2.55			5.52449
		265.67	2.55	0.12	0.89	6.23512
		266.6	2.55	0.1	1.4	9.43226
		267.46	2.55	0	1.2	2.385
		267.93	2.55			9.35267
		268.75	2.55	0.02	1.11	8.60472
		269.58	2.55	0.05	1.17	11.7328
		271.9	2.55	0.02	1.39	18.8883
		272.71	2.55	0.04	1.43	21.8497
		273.57	2.55	0.04	1.5	16.3545
		274.23	2.55	0.11	1.54	19.0199
		275.45	2.55	0.09	1.41	7.1239
		277.55	2.55	0.01	1.38	4.42282
		278.47	2.55			4.83862
		279.4	2.55			1.27608
		280.02	2.55	0.04	1.1	6.93837
		281.35	2.55	0.08	1.17	2.29845
		282.47	2.55			0.578223
		283.5	2.55			2.08408
		284.68	2.55			2.11127
		285.3	2.55			1.3515
		286.81	2.55			5.62488
		288.1	2.55			15.2243
		289.05	2.55			3.96474
	Shale, Nauga Fm.	483.6	2.55			1.44372
		484.38	2.55			0.490743
		484.92	2.55			1.45121
		486.07	2.55			2.64689
		486.76	2.55			1.02344
		487.68	2.55			0.879385
		490.18	2.55			1.09802
		491.89	2.55			0.97902
		493.33	2.55			0.895374
		494.51	2.55			0.9243
		495.75	2.55			1.37503
		637.14	2.55			1.06682
		637.72	2.55			1.12217
		638.15	2.55			1.21707
		638.56	2.55	0.03	0.22	1.21074
		639.35	2.55	0.03	0.32	1.50624
		639.83	2.55			0.943228
		439.64	2.55	0.04	0.38	1.58342
		440.3	2.55			2.12128
		441.67	2.55	0.12	0.35	2.25465
		442.49	2.55	0.11	0.32	2.67645
		443.51	2.55			2.46211
		444.7	2.55			2.58915
		445.88	2.55	0.07	0.31	2.17318
		446.51	2.55			2.3737
		447.19	2.55	0.03	0.32	2.41468
		448.16	2.55			2.33688
		448.68	2.55			2.4352
		449.13	2.55	0	0.31	2.38971
		450.4	2.55			1.51181
		451.38	2.55			1.54098
		452.15	2.55	0.03	0.24	1.53997
		452.9	2.55			1.85735
		453.8	2.55	0.01	0.24	1.49776
		454.71	2.55			1.45337
		616.11	2.55			0.8888
		617	2.55			1.16338
		618	2.55			1.11821
		618.86	2.55		0.27	0.903402
		619.81	2.55			0.866688
		620.27	2.55			0.8208
		620.88	2.55			0.704344
		621.88	2.55			0.686256
		623.07	2.55			0.68376
		625.18	2.55	0.1	0.09	0.861021
		625.9	2.55			0.778128
		626.54	2.55			0.45125
		627	2.55	0.03	0.24	1.13791
		829.35	2.55			0.195468
		830.46	2.55	0.03	0.24	0.943228
		831.24	2.55			1.30488
		831.58	2.55			0.869792
		832.36	2.55			1.36633
		833.84	2.55	0.03	0.27	0.793897
		835.1	2.55			1.07635
		836.3	2.55			0.74864
		836.94	2.55	0.11	0.19	1.06808
		837.7	2.55			0.802791
Mänd et al., 2020
	Shale, Zaonega Fm.	4000319	2			0.13
		4000320	2			0.18
		4000321	2			0.29
		4000322	2			0.17
		4000323	2			0.14
		4000324	2			0.2
		4000332	2			0.57
		4000336	2			1.81
		4000342	2			1.66
		4000345	2			3.76
		4000346	2			0.42
		4000347	2			1.05
		4000348	2			6.31
		4000349	2			0.24
		4000351	2			0.16
		4000358	2			0.78
		4000362	2			0.15
		4000368	2			1.58
		4000376	2			0.12
		4000383	2			0.52
		4000392	2			0.2
		4000393	2			0.2
		4000394	2			0.28
		4000395	2			0.07
		4000396	2			1.46
		4000398	2			0.11
		4000403	2			0.3
		4000406	2			0.16
		4000412	2			1.83
		4000413	2			0.37
		4000414	2			0.74
		4000421	2			0.31
		4000429	2			0.17
		4000931	2	0.0909121	0.277353	9.95648
		4000436	2			0.57
		4000442	2			0.16
		4000932	2			21.2986
		4000447	2			17.04
		4000933	2			28.8785
		4000455	2			0.37
		4000466	2			1.34
		4000471	2			0.39
		4000478	2			1.24
		4000934	2			53.1275
		4000483	2			68.74
		4000484	2			2.04
		4000935	2			68.5254
		4000491	2			41.05
		4000936	2	0.103558	0.811796	187.173
		4000492	2			138.19
		4000493	2			38.98
		4000937	2			119.663
		4000938	2			108.327
		4000494	2			117.91
		4000939	2			131.004
		4000500	2			2.18
		4000940	2	0.0896647	0.77444	149.194
		4000504	2			101.95
		4000941	2			209.002
		4000516	2			4.92
		4000005	2			1.19
		4000521	2			6.86
		4000953	2			172.894
		4000954	2			486.819
		4000015	2			2.52
		4000529	2			38.47
		4000943	2	0.135078	1.49344	1009.31
		4000030	2			1.33
		4000536	2			18.21
		4000037	2			7.03
		4000955	2	0.0823962	0.978287	47.7401
		4000543	2			3.42
		4000944	2			368.034
		4000045	2			4.96
		4000945	2			880.259
		4000553	2			8.99
		4000053	2			7.17
		4000561	2			11.28
		4000061	2			8.02
		4000563	2			10
		4000946	2			11.0487
		4000959	2			99.3901
		4000065	2			134.9
		4000571	2			2.41
		4000947	2			509.869
		4000575	2			557
		4000080	2			4.01
		4000960	2			169.727
		4000583	2			2.24
		4000090	2			2.47
		4000592	2			1.68
		4000098	2			2.94
		4000948	2	0.0685732	1.10841	202.356
		4000961	2			350.174
		4000949	2			416.388
		4000100	2			181.78
		4000962	2			153.147
		4000593	2			268.9
		4000963	2			21.5676
		4000102	2			322.94
		4000965	2			271.349
		4000594	2			228.81
		4000966	2	0.0911173	0.82115	320.755
		4000597	2			5.17
		4000103	2			235.03
		4000601	2			263.02
		4000950	2	0.0615228	0.67067	201.339
		4000967	2			292.12
		4000602	2			243.85
		4000968	2			179.537
		4000108	2			57.26
		4000605	2			14.15
		4000969	2			225.504
		4000113	2			185.94
		4000614	2			2.38
		4000951	2			226.367
		4000114	2			195.63
		4000970	2	0.0987006	0.540159	240.304
		4000618	2			131.87
		4000971	2			221.972
		4000972	2	0.113093	0.780104	141.003
		4000115	2			169.01
		4000619	2			83.41
		4000122	2			185.97
		4000973	2	0.0824069	0.356944	97.5199
		4000623	2			7.18
		4000128	2			2.25
		4000129	2			174.63
		4000974	2			163.227
		4000975	2	0.0721988	0.711159	134.461
		4000130	2			21.07
		4000132	2			96.83
		4000976	2			123.591
		4000133	2			49.35
		4000977	2			86.0609
		4000978	2			112.13
		4000134	2			80.05
		4000135	2			13.31
		4000980	2			62.195
		4000151	2			3.14
		4000981	2			8.54121
		4000159	2			38.37
		4000982	2	0.081606	-0.0448414	71.1366
		4000168	2			7.61
		4000178	2			13.51
		4000983	2			22.4911
		4000179	2			73.99
		4000984	2			33.1102
		4000180	2			124.51
		4000985	2			105.759
		4000181	2			62.33
		4000986	2			265.65
		4000987	2			124.186
		4000187	2			99.09
		4000988	2	0.0720736	0.820505	291.288
		4000190	2			9.02
		4000201	2			99.49
		4000989	2			229.836
		4000202	2			12.01
		4000203	2			1.05
		4000214	2			0.35
		4000216	2			0.66
		4000225	2			0.29
		4000231	2			0.55
		4000239	2			0.56
		4000244	2			0.3
		4000251	2			5.62
		4000256	2			0.13
		4000264	2			4.33
		4000265	2			2.25
		4000266	2			11.72
		4000991	2			26.696
		4000992	2			47.7175
		4000267	2			33.42
		4000993	2			73.5614
		4000268	2			14.2
		4000994	2			38.7151
		4000269	2			11.04
		4000270	2			10.76
		4000271	2			3.08
		4000273	2			2.98
		4000279	2			4.95
		4000280	2			12.79
		4000995	2			34.3812
		4000281	2			27.03
		4000288	2			2.62
		4000289	2			21.63
		4000996	2			31.7549
		4000290	2			5.78
		4000997	2			44.4865
		4000998	2	0.114144	-0.0233174	68.196
		4000291	2			66.18
		4000299	2			1.63
		4000999	2			95.0406
		4000306	2			48.84
Robbins et al., 2016
	Shale		2.662			5
			2.662			3
			2.662			2
			2.662			3
			2.662			3
			2.662			2
			2.662			2
			2.662			3
			2.662			2
			2.662			4
			2.662			3
			2.662			2
			2.662			3
			2.662			6
			2.662			4
			2.52			5.49101
			2.52			6.28591
			2.52			3.89278
			2.52			5.64042
			2.52			4.78447
			2.52			4.54295
			2.52			8.60783
			2.52			6.80954
			2.52			5.09755
			2.52			3.82257
			2.52			7.59156
			2.52			5.08317
			2.52			6.47202
			2.52			6.23512
			2.52			8.60472
			2.52			11.7328
			2.52			18.8883
			2.52			21.8497
			2.52			16.3545
			2.52			19.0199
			2.52			6.93837
			2.501			19.4
			2.501			8.3
			2.501			15.2
			2.501			17.5
			2.501			23.5
			2.501			11.9
			2.501			19.1
			2.501			19
			2.501			16.8
			2.501			19
			2.501			20.7
			2.501			25
			2.501			22.6
			2.501			29.1
			2.501			30.5
			2.501			20.4
			2.501			21.9
			2.501			18.6
			2.501			19.1
			2.501			13.5
			2.501			41.4
			2.501			33.7
			2.501			40.1
			2.501			40.3
			2.501			27.1
			2.501			20.2
			2.501			37.1
			2.501			16.5
			2.15			2
			2.15			48
			2.15			10
			2.15			7
			2.15			26
			2.15			7
			2.15			8
			2.05			4
			2.05			2
			2.05			2
			2.05			12
			2.05			74
			2.05			28
			1.84			32
			1.84			20
			1.84			24
			1.84			20
			1.84			32
			1.84			35
			1.84			42
			1.84			24
			1.84			29
			1.84			15.4
			1.84			7.1
			1.84			15.2
			1.84			13.9
			1.84			21
			1.84			24
			1.84			26
			1.84			62
			1.84			15
			1.84			10
			1.84			14
			1.84			12
			1.84			54
			1.84			31
			1.84			24
			1.84			36
			1.84			33
			1.84			23
			1.84			34
Albut et al., 2019
	Shale, Mozaan Gr.	16-S-594	2.95	0.011	0.267	0.7948
		16-S-530	2.95	0.012	0.63	0.5334
		16-S-450	2.95	0.019	0.466	0.5719
Planavsky et al., 2018
	Shale, Stambaugh Fm.	92-2/ 55.0	1.85		-0.9	13.7
		92-2/ 145.0	1.85		-0.7	1.47
		92-2/ 261.0	1.85		0.9	332
		92-2/ 262.5	1.85		1.1	41.4
		92-2/ 264.0	1.85		2.3	60.8
		92-2/ 277.5	1.85		-0.617705	19.6
		92-2/ 281.5	1.85		-0.321092	2.29
		92-2/ 290.0	1.85		-0.742906	2.53
		92-2/ 300.0	1.85		-0.83213	25.1
		92-2/ 304.5	1.85		-0.864175	20.4
		92-2/ 309.0	1.85		-1.04188	19.1
		92-2/ 316.5	1.85		-1.00347	13.5
		92-2/ 332.5	1.85		0.270474	14.9
		92-2/ 334.0	1.85		0.205032	12.5
		92-2/ 335.5	1.85		-0.222879	41.6
Partin et al., 2015
	Shale, Bravo Lake Fm.	PIL-14	1.93		0.55	22.5
		PIL-13	1.93		0.47	19.9
		PIL-12	1.93		0.58	12.8
		PIL-11	1.93		0.49	17.7
		PIL-10	1.93		0.56	17.4
		PIL-9	1.93		0.58	31.2
		PIL-8	1.93		0.48	23
		PIL-7	1.93		0.47	24.2
		PIL-6	1.93		0.43	23.5
		PIL-5	1.93		0.45	18.2
		PIL-4	1.93		0.5	24.8
		PIL-3	1.93		0.48	51.3
		PIL-2	1.93		0.44	37.1
		PIL-1	1.93		0.49	25.6
Cabral et al., 2013
	Shale, Carajás Fm.	AM-02	2.75		1.8	12.1
		AM-03	2.75		1.43	11.4
		AM-04A	2.75		1.3	11.5
		AM-05A	2.75		0.48	8.7
		AM-09	2.75		0.88	18.8
		AM-11	2.75		1.16	17
		AM-16A	2.75		0.53	5.7
		AM-17	2.75		0.77	13
		AM-18A	2.75		0.73	18.3
		AM-21-2	2.75		0.66	5
		AM-21-3	2.75		0.17	0.7
		AM-21-5	2.75		0.88	28.6
		AM-21-6	2.75		0.49	4.1
		AM-21-7	2.75		0.69	4.7
		AM-21-8	2.75		0.51	2.1
		AM-21-9	2.75		0.67	5.8
Eroglu et al., 2015
	Shale, Oaktree Fm.	665.28	2.52		0.23	0.523
		673.8	2.52		0.57	0.761
		1350.9	2.56		0.34	1.821
		1406.8	2.56		0.55	1.344
		1428.4	2.56		0.5	0.438
		1429.1	2.56		0.26	1.427
		1462.1	2.56		0.14	1.719
		1493.5	2.56		0.38	1.474
		1495.8	2.56		0.41	1.441
	Shale, Lyttleton Fm.	1499.85	2.56		0.4	2.674
		1544.1	2.56		0.13	1.066
		1551.7	2.56		0.93	3.102
	Shale, Eccles Fm.	1557.7	2.58		0.65	1.178
		1673.3	2.58		0.16	0.609
		1776	2.58		1.17	2.653
		1790.3	2.58		0.3	0.742
		1800.3	2.58		1.24	5.267
		1811.2	2.58		0.58	1.323
Carbonate
Voegelin et al., 2010
	Dolomite, core GKP0, Klein Naute Fm., Ghaap Gp.	315.6	2.5	0.04	1.29	1.01
		319.65	2.5	0.04	1.08	0.35
	Dolomite, core GKP01, Upper Nauga Fm., Ghaap Gp.	333.15	2.55	0.05	0.91	0.39
		346.9	2.55	0.03	1.14	0.63
		395.8	2.55	0.03	0.7	0.15
		460.3	2.55	0.04	0.51	0.24
		480.64	2.55	0.1	0.41	0.12
		516.25	2.55	0.03	0.53	0.96
		545.1	2.55	0.03	0.52	0.22
		561.95	2.55	0.07	0.62	0.31
		567.4	2.55	0.06	0.82	0.17
		577.84	2.55	0.03	0.87	0.56
		619	2.55	0.12	0.77	0.19
		634.45	2.55	0.1	0.8	0.17
		667	2.55	0.04	0.78	0.12
	Dolomite, core GKP01, Lower Nauga Fm., Ghaap Gp.	693.84	2.55	0.05	1.06	0.17
		699.23	2.55	0.04	1.14	0.07
		755.51	2.55	0.03	0.69	0.15
		796.22	2.55	0.04	0.92	0.16
		859.9	2.55	0.06	0.64	0.07
		911.8	2.55	0.06	1.25	0.02
	Dolomite, core GKP01, Monteville Fm., Ghaap Gp.	959.9	2.55	0.04	1.1	0.12
		987.24	2.55	0.03	1.33	0.11
	Dolomite, core GKP01, Boomplaas Fm., Ghaap Gp.	1117.6	2.6	0.04	0.83	0.22
		1132.15	2.6	0.06	0.15	0.14
		1184.8	2.6	0.04	0.5	0.7
	Dolomite, core GKP01, Vryburg Fm., Ghaap Gp.	1198.4	2.64	0.06	0.35	0.13
		1207.3	2.64	0.03	0.46	0.43
		1211.3	2.64	0.06	0.47	0.21
	Dolomite, core GKF01, Klein Fm., Ghaap Gp.	287.6	2.5	0.02	1.55	1.5
	Dolomite, core GKF01, Upper Nauga Fm., Ghaap Gp.	331.9	2.55	0.03	0.99	0.72
		395.4	2.55	0.04	0.89	0.38
		503.16	2.55	0.06	0.79	0.05
		570.16	2.55	0.07	0.56	0.12
		745.12	2.55	0.04	0.83	0.4
		790.18	2.55	0.04	0.59	0.19
	Dolomite, core GKF01, Lower Nauga Fm., Ghaap Gp.	925.9	2.55	0.06	0.46	0.12
		1094.84	2.55	0.05	0.38	0.36
		1229.94	2.55	0.05	0.89	0.03
		1302.78	2.55	0.03	0.33	0.27
	Dolomite, core GKF01, Monteville Fm., Ghaap Gp.	1386.26	2.55	0.07	1.58	0.01
		1429.08	2.55	0.04	1.14	0.26
	Dolomite, core GKF01, Lokammonna Fm., Ghaap Gp.	1458.42	2.6	0.04	-0.67	0.33
Eroglu et al., 2015 †
	Carbonates, KMF 5, Eccles Fm., Malmani Gp.	665.08m	2.52	0.09	0.44	0.015
		665.18m	2.52	0.09	0.52	0.158
		672.77m	2.52	0.09	0.57	0.061
		672.80m	2.52	0.09	0.53	0.042
		673.84m	2.52	0.09	0.53	0.104
		673.87m	2.52	0.09	0.45	0.026
		676.57m	2.52	0.09	0.49	0.097
		678.60m	2.52	0.09	0.54	0.028
		680.58m	2.52	0.09	0.44	0.034
		692.98m	2.52	0.09	0.33	0.037
		693.38m	2.52	0.09	0.36	0.022
		695.99m	2.52	0.09	0.38	0.053
		697.03m	2.52	0.09	0.53	0.112
		697.18m	2.52	0.09	0.11	0.035
		705.70m	2.52	0.09	0.63	0.078
		711.70m	2.52	0.09	0.58	0.03
		711.80m	2.52	0.09	0.6	0.083
		788.50m	2.52	0.09	1.24	0.034
		875.50m	2.52	0.09	0.6	0.022
		884.83m	2.52	0.09	0.12	0.009
		921.78m	2.52	0.09	0.56	0.026
	Carbonates, KMF5, Lyttleton Fm., Malmani Gp.	985.50m	2.52	0.09	0.66	0.039
		1062.50m	2.52	0.09	0.49	0.009
		1072.73m	2.52	0.09	0.26	0.021
		1100.20m	2.52	0.09	0.45	0.016
		1119.50m	2.52	0.09	0.24	0.016
		1136.75m	2.52	0.09	0.29	0.01
	Carbonates, KMF5 , Monte Christo Fm., Malmani Gp.	1143.70m	2.52	0.09	0.59	0.018
		1197.30m	2.52	0.09	1.4	0.087
		1197.34m	2.52	0.09	1.37	0.119
		1199.45m	2.52	0.09	0.45	0.015
		1199.50m	2.52	0.09	0.7	0.152
		1202.58m	2.52	0.09	0.1	0.021
		1222.32m	2.52	0.09	0.48	0.038
		1239.98m	2.52	0.09	0.35	0.009
		1265.10m	2.52	0.09	0.84	0.114
		1401.00m	2.52	0.09	0.5	0.016
		1403.80m	2.52	0.09	0.59	0.012
		1406.70m	2.52	0.09	0.57	0.782
		1406.80m	2.52	0.09	0.55	0.019
		1407.90m	2.52	0.09	0.43	0.604
		1413.34m	2.52	0.09	0.45	0.014
		1425.40m	2.52	0.09	0.51	0.01
		1435.25m	2.52	0.09	0.49	0.023
		1442.17m	2.52	0.09	0.52	0.014
		1454.61m	2.52	0.09	1	0.02
		1464.30m	2.52	0.09	0.64	0.018
		1467.10m	2.52	0.09	0.46	0.008
		1475.35m	2.52	0.09	0.31	0.009
		1475.60m	2.52	0.09	0.52	0.734
		1478.60m	2.52	0.09	0.27	1.314
		1484.80m	2.52	0.09	0.37	0.03
		1491.30m	2.52	0.09	0.43	0.056
		1491.85m	2.52	0.09	0.39	0.005
		1521.40m	2.52	0.09	1.06	0.189
		1524.70m	2.52	0.09	0.21	0.011
		1539.90m	2.52	0.09	0.33	0.019
		1558.88m	2.52	0.09	-0.82	0.016
		1564.30m	2.52	0.09	0.3	0.018
		1574.150m	2.52	0.09	0.45	0.015
		1574.20m	2.52	0.09	0.87	0.016
		1574.25m	2.52	0.09	0.4	0.015
		1574.30m	2.52	0.09	0.46	0.026
		1589.75m	2.52	0.09	0.83	0.019
		1589.90m	2.52	0.09	0.49	0.011
		1604.60m	2.52	0.09	0.71	0.008
		1673.10m	2.52	0.09	-0.09	0.005
	Carbonates, KMF5, Oaktree Fm., Malmani Gp.	1731.10m	2.55	0.09	0.57	0.007
		1731.30m	2.55	0.09	0.41	0.011
		1742.30m	2.55	0.09	0.27	0.005
		1775.80m	2.55	0.09	0.83	0.063
		1790.00m	2.55	0.09	0.28	0.036
		1790.10m	2.55	0.09	0.45	0.028
		1800.10m	2.55	0.09	1.08	0.022
	Carbonates, BH1 (SACHA), Reivilo Fm., Campbellrand Gp.	2041.00m	2.6	0.09	0.68	0.13
		2098.00m	2.6	0.09	-0.32	0.068
		2121.00m	2.6	0.09	0.43	0.04
		2131.00m	2.6	0.09	0.28	0.023
		2160.00m	2.6	0.09	0.55	0.035
		2250.00m	2.6	0.09	0.43	0.02
		2275.00m	2.6	0.09	0.55	0.019
		2293.00m	2.6	0.09	0.43	0.021
		2400.00m	2.6	0.09	0.48	0.028
Thoby et al., 2019
	Gamohaan Fm., Campbellrand Sg, South Africa (27°23.000'S, 23°20.833'E and 27°37.666'S, 23°24.05'E)	ALI-DS-82B	2.52	0.0297035	0.936342	0.0490026
		ALI-DS-82D	2.52	0.0380047	0.786201	0.050152
		KU009DS01A	2.52	0.0183244	0.0588387	0.0239191
		KU009DS01B	2.52	0.0871769	0.376571	0.0222414
		KU009DS01C	2.52	0.0638448	1.10849	0.00458023
		KU009DS01C duplicat	2.52	0.0285839	1.02735	0.006
		KU100DS01A	2.52	0.0394111	0.331483	0.042777
		KU100DS01B	2.52	0.0563442	0.359336	0.049342
	Mosher Fm., Steep Rock, Canada, (48°47.717'N, 91°38.000'W and 48°48.983'N, 91° 38.367'W)	P-02	2.78	0.000859568	1.17533	0.041977
		P-02 duplicat	2.78	0.375598	1.19182	0.05
		P-06	2.78	0.0500225	0.499164	0.0322864
		P-09	2.78	0.22127	0.77317	0.0269947
		P-10	2.78	0.0360036	1.21803	0.0430416
	Ball Assem., Red Lake greenstone, Canada, (51°03.000'N, 94°07.017'W and 51°01.867'N, 94°11.400'W)	P-30	2.94	0.0169453	0.381405	0.0555325
		P-31	2.94	0.0878009	-1.53964	0.0566077
		P-32	2.94	0.0475565	0.244547	0.0731838
		P-33	2.94	0.0428956	0.397574	0.100778
		P-33 duplicat	2.94	0.0615409	0.452564	0.097
		P-34	2.94	0.238387	0.425899	0.0224813
		P-34 duplicat	2.94	0.116051	0.197535	0.018
		P-35	2.94	0.157497	0.896404	0.041999
		P-35 duplicat	2.94	0.0433993	1.03089	0.048
	Chonebi Fm.,Nsuze G., South Africa, (28°14.476'S, 31°10.313'E and 28°14.437'S, 31°10.300'E)	1A	2.97	0.163977	-0.0521633	0.0890096
		1B	2.97	0.0176116	0.23383	0.170703
		2A	2.97	0.00810248	0.316527	0.0784008
		2B	2.97	0.0118515	-0.270233	0.100928
		3A	2.97	0.073627	-0.0319596	0.115133
		3B	2.97	0.0212071	-0.194696	0.129154
		8	2.97	0.0133725	-0.3721	0.128749
		9A	2.97	0.239182	-0.161958	0.161419
		9B	2.97	0.103605	-0.596274	0.111392
		10A	2.97	0.00812364	-0.037602	0.0771085
		10B	2.97	0.0874919	-0.218765	0.20322
Hodgskiss et al., 2021
	Kasegalik Fm., Belcher Gr.	90	2.01	0.234408	0.463045	0.0642103
		173.8	2.01	0.275441	0.355532	0.0627101
		215.6	2.01			0.168036
		229.6	2.01			0.0568267
		19.2	2.01	0.253261	0.142508	0.140444
		146.9	2.01			0.107104
		305.6	2.01			0.0177796
		342.5	2.01	0.00047659	0.448989	0.047318
		380.7	2.01			0.0392655
		432.3	2.01	0.0584932	0.509434	0.0729465
		482.4	2.01			0.0140852
		529.9	2.01	0.0585969	0.229676	0.1619
		819.5	2.01			0.0602098
		15	2.01			0.223202
		56.1	2.01			0.0774215
		132.5	2.01			0.138856
		66.4	2.01			0.231012
		105.8	2.01			0.0703547
		185	2.01			0.0462943
		228.1	2.01			0.12601
		268	2.01	0.0218196	0.378247	0.0350871
		591.3	2.01			0.0928934
		628.9	2.01			0.0818973
		680.4	2.01			0.0436589
		729.5	2.01	0.100516	0.203872	0.0219426
	Fariweather Fm., Belcher Gr.	206.5	2.01	0.110444	0.308626	0.343019
		237.5	2.01			0.868342
		265	2.01			0.131662
		285.5	2.01			0.0982486
		286.1	2.01			0.287374
		338	2.01			0.134894
		341.3	2.01	0.0946407	0.329835	0.0976402
		357.2	2.01			0.104513
		403	2.01			0.23354
		437.5	2.01			0.0853921
		516.1	2.01			0.0549643
		20.8	2.01	0.0834071	0.531082	0.0411874
		533	2.01			0.0869622
		542.1	2.01			0.0403366
	Mcleary Fm., Belcher Gr.	0	2.01			0.0533705
		59.1	2.01	0.224289	0.535025	0.227994
		95.7	2.01	0.304698	0.154382	0.114071
		144.5	2.01	0.285188	0.765899	0.0508978
		169.7	2.01			0.0465974
		201.6	2.01			0.0330116
		305.5	2.01	0.034105	0.481225	0.0271761
		369.2	2.01	0.0376248	0.600006	0.0346921
		434.7	2.01			0.0361049
		505.1	2.01	0.0482574	0.530337	0.354702
		543.8	2.01	0.274991	0.317331	0.0556429
		35.1	2.01			0.0561093
		94.1	2.01			0.0463828
		157.8	2.01			0.150704
		198.7	2.01	0.0596241	0.387163	0.3003
		224.2	2.01	0.0226304	0.514389	0.0658491
		285.3	2.01			0.0923633
		316.1	2.01	0.0337199	0.106908	0.0797567
		346	2.01			0.0541208
		371.7	2.01	0.0586284	0.27056	0.0575374
		400.2	2.01	0.0802465	0.560814	0.516411
		431.7	2.01			0.540247
		461	2.01			0.185341
		59.5	2.01	0.0573583	0.288817	0.0235409
		235.4	2.01	0.0612596	0.00259278	0.160976
		270.1	2.01	0.048617	1.21499	0.1602
		0.9	2.01			1.78309
	Tukarak Fm., Belcher Gr.	33.9	2.01	0.164559	-0.271213	0.0247025
		575.6	2.01	0.0798871	0.631448	0.225275
		607.9	2.01	0.0272557	0.361722	0.0914056
	Mavor Fm., Belcher Gr.	77.9	2.01			0.026777
		110.5	2.01	0.140688	0.40547	0.0126114
		143.7	2.01			0.0243898
		177.4	2.01			0.0174204
		0.8	2.01			0.0459464
		32.2	2.01	0.327971	-0.678163	0.0318515
		61.9	2.01			0.0224542
		94.1	2.01			0.0259568
		121.2	2.01	0.149589	0.117473	0.0220433
		150.5	2.01	0.0190703	0.338146	0.0218218
		184.5	2.01	0.148839	0.282776	0.0236403
		200.7	2.01			0.340032
	Costello Fm., Belcher Gr.	275.2	2.01			0.122399
		307	2.01			0.0815234
		346.5	2.01	0.0705472	0.302084	0.0938232
		373.8	2.01			0.0473369
		407.6	2.01			0.0565323
		269.8	2.01	0.196988	0.241678	0.0151823
		299.2	2.01	0.255735	0.0139945	0.00830409
		30.2	2.01			0.539967
		65.6	2.01	0.0639095	0.175855	0.178335
		93.2	2.01			0.109771
		120.6	2.01	0.343178	-0.154911	0.0913199
		150	2.01			0.0715197
		182.3	2.01	0.170849	-0.109837	0.0822144
		208.6	2.01			0.0565962
		241.5	2.01			0.0360885
		271.7	2.01			0.0298138
		12	2.01	0.125712	-0.259673	0.0815154
		104.3	2.01			0.42947
		106.8	2.01			0.164638
		108.3	2.01			0.108177
		22.4	2.01			0.0563935
		245.4	2.01			0.172783
		445.4	2.01			0.0508515
		213	2.01			0.0255658
		240.6	2.01	0.0492351	0.156593	0.171729
		1.2	2.01	0.0181072	0.0461804	0.166455
		102.4	2.01			0.0177968
	Laddie Fm., Belcher Gr.	297	2.01			0.0406494
		300.5	2.01			0.188413
		46.7	2.01	0.036503	-0.115165	0.0750853
		77.8	2.01	0.0446075	-1.04817	0.0501771
		100.8	2.01			0.0276154
		121.6	2.01	0.0334426	0.0606678	0.103801
		146.4	2.01	0.0465813	-0.0439735	0.0233789
		186.4	2.01	0.147523	-0.0375047	0.0210411
		213.7	2.01	0.129194	0.104471	0.0141784
		235.9	2.01			0.0383761
		252.8	2.01	0.168109	0.010855	0.147484
		265.3	2.01			0.075293
	Rowatt Fm., Belcher Gr.	62.1	2.01	0.132258	0.213784	0.059887
		81.6	2.01	0.0249432	0.406884	0.285704
		32.3	2.01			0.136691
		184.8	2.01	0.0635392	0.429669	0.0416415
		228.7	2.01	0.0822531	0.23745	0.794186
		247.5	2.01	0.105376	0.116199	0.0325055
		267.5	2.01			0.0714454
		288.9	2.01	0.101194	0.147299	0.0288436
		309.1	2.01	0.0588237	-0.0462524	0.317377
		325.5	2.01			0.0902736
		248.8	2.01	0.0711659	0.701318	0.0981053
		272.4	2.01	0.0343724	0.325478	0.0487155
		420.1	2.01			0.275332
		19.1	2.01			1.00845
		111	2.01	0.111112	0.53989	0.0558829
		207.5	2.01			0.0343079
		121	2.01	0.0181964	0.193008	0.0293729
		153.7	2.01	0.0726549	0.100521	0.0161053
		186.3	2.01			0.0321818
		394.8	2.01	0.0848245	0.306609	0.0388259
		287.3	2.01	0.266589	-0.105562	0.120402
		0.5	2.01	0.0327783	0.0233526	3.98576
		41.9	2.01	0.10194	0.257607	2.31234
		0.9	2.01			0.0518481
		124.9	2.01			0.283778
		63	2.01			0.0373019
		146.4	2.01	0.0122176	0.380493	0.138836
		165.6	2.01			0.257973
		90.1	2.01			0.0457074
		213.4	2.01			0.425899
		377.8	2.01			0.105282
	Le Fer Fm., Labrador Trough	398	2.05			0.230448
		404.4	2.05			0.194374
		404.7	2.05			0.137193
		472	2.05			0.105368
		599	2.05	0.0668528	-0.394098	0.0889736
		599.4	2.05			0.112245
		631	2.05			0.160945
		1043.4	2.05			0.124836
		1043.9	2.05	0.0908614	0.127719	0.0954685
		0.4	2.05			0.0794631
		4.9	2.05			0.0774016
		54.6	2.05			0.071986
		62.2	2.05			0.0794531
		85	2.05			0.0607875
		85.5	2.05			0.081257
		2.1	2.05			0.0625511
		3.8	2.05			0.0373523
		18.7	2.05	0.0392198	-0.207902	0.0438296
		22	2.05			0.140486
		6.7	2.05			0.0684996
		8	2.05	0.145988	1.34883	0.0530046
		15	2.05			0.0480512
		18.7	2.05	0.0690292	-0.0555076	0.222723
		468.6	2.05			0.178164
		8.1	2.05			0.0572179
		11.4	2.05			0.031998
		12.6	2.05	0.0942822	-0.401186	0.0801195
		12.9	2.05			0.0706313
		13.3	2.05			0.0672693
		13.7	2.05			0.0503499
		13.8	2.05	0.119486	0.022373	0.0650469
		10.8	2.05	0.123668	0.285459	0.0718067
		11.9	2.05	0.283105	0.674986	0.0355874
	Denault Fm., Labrador Trough	0.3	2.05	0.0845051	0.17544	2.2372
		6.5	2.05			0.375568
		17.6	2.05	0.167565	-0.111331	0.321103
		96	2.05			1.16732
		115	2.05			0.502698
		138.6	2.05			0.657744
		166.1	2.05			0.346118
		183.6	2.05	0.0895061	-0.0512686	0.278355
		200.4	2.05			0.19273
		207.3	2.05			0.601843
		218.9	2.05			0.946075
		228.2	2.05	0.0625869	0.694635	0.467414
		593	2.05	0.0258968	0.267099	0.0519158
		619.6	2.05			0.184783
		632.5	2.05			0.0860928
		652.9	2.05	0.102023	0.460658	0.0706281
		95.6	2.05	0.0356106	0.303678	0.153498
		166.2	2.05	0.0985861	0.209615	0.0879959
		230.7	2.05			0.074374
		263.6	2.05	0.0714923	0.190089	0.140793
		290.7	2.05	0.0898748	-0.307955	0.0999869
		316.5	2.05			0.102873
		348.1	2.05	0.0874023	0.175468	0.09335
		381.2	2.05			0.0634036
		410	2.05	0.152374	-0.256878	0.0715198
		446.7	2.05	0.102797	0.0125868	0.0771384
		489.6	2.05	0.218879	-0.131811	0.046335
		517.4	2.05			0.0496837
		548.9	2.05	0.274935	-0.822126	0.0605962
		0.2	2.05			1.04612
		8.4	2.05			0.44767
		33.2	2.05			0.554068
		50.2	2.05			0.493064
		73	2.05			0.160198
		130.1	2.05			0.17175
		199.8	2.05	0.0965648	0.0858393	0.0738152
		2.7	2.1			0.109879
		7.6	2.1			0.0809626
		10.1	2.1			0.0757638
		16.8	2.1			0.063397
		18.3	2.1			0.0497646
		19.7	2.1	0.579901	0.565342	0.0438669
		21.8	2.1			0.0363646
		23.1	2.1			0.0455629
	Rantamaa Fm., Finnish Lapland	1.8	2.1			0.0359941
		2.5	2.1			0.422995
		3.2	2.1
		4.5	2.1
		5.6	2.1			0.215517
		6.4	2.1
		7.8	2.1
		8.8	2.1			0.164612
		10.4	2.1
		12.8	2.1
		14.1	2.1			0.134137
		15.4	2.1
		16	2.1			0.0864624
		17.3	2.1
		18.6	2.1
		19.1	2.1
		19.9	2.1
		22.3	2.1			0.0925621
		23.8	2.1
		24.5	2.1
		25.8	2.1			0.0850303
		27.2	2.1
		28.7	2.1
		29.9	2.1
		30.6	2.1	0.100055	0.676637	0.0776822
		0	2.1
		1.4	2.1
		2.3	2.1
		3.3	2.1
		4.2	2.1
		5.5	2.1
		6.8	2.1			0.0522949
		7.6	2.1
		8.6	2.1
		9.6	2.1			0.0564438
		10.6	2.1
		11.8	2.1
		13.1	2.1	0.110045	0.0250268	0.048385
		14	2.1
		15.3	2.1
		16.6	2.1			0.0238313
		17.9	2.1
		20.5	2.1	0.439283	-0.115116	0.0335705
		21.6	2.1
		22.5	2.1
		0.4	2.1			0.0334966
		1.6	2.1
		2.6	2.1
		3.6	2.1
		4.6	2.1			0.0342514
		6	2.1
		7.3	2.1
		8.5	2.1			0.0290209
		9.3	2.1
		10.2	2.1
		11.3	2.1
		12.8	2.1	0.045432	0.72343	0.0437939
		13.3	2.1
		14.4	2.1
		15.1	2.1
		16.2	2.1			0.0225549
		17.3	2.1
		18.8	2.1
		20	2.1
		20.9	2.1			0.0424356
		22.3	2.1
		23.3	2.1
		24.7	2.1
		26.2	2.1			0.023261
		27.7	2.1
		29.2	2.1
		30	2.1
		31.1	2.1	0.291948	0.123935	0.073724
		32.2	2.1
		33.2	2.1
		34.5	2.1
		36	2.1			0.0424859
		36.8	2.1
		38	2.1
		39.1	2.1
		40.3	2.1			0.0329294
		41.8	2.1
		42.5	2.1
		43.9	2.1
		44.7	2.1	0.178839	0.2389	0.0284865
		45.7	2.1
		46.7	2.1
		48	2.1
		49.8	2.1			0.0334706
		50.9	2.1
		51.9	2.1
		53.9	2.1			0.20086
		1.9	2.1
		5.5	2.1			0.0142558
		9.3	2.1			0.0285841
		13	2.1
		16.9	2.1			0.0237394
		20.8	2.1	0.86079	-0.22165	0.0235965
		26.9	2.1			0.0313653
		31.6	2.1	0.0223351	0.434649	0.0462342
		36.3	2.1			0.300514
		41.7	2.1	0.173969	0.853927	0.15871
		44.3	2.1
		48.3	2.1	0.326241	0.0835347	0.15904
		52	2.1			0.092842
		55.4	2.1
		56.5	2.1	0.0312927	0.561376	0.0724825
		58.6	2.1
		62.8	2.1			0.0876134
		66.2	2.1			0.0756785
		70.8	2.1			0.0605856
		75	2.1	0.250366	0.329878	0.049526
		3.4	2.1	0.488184	-0.948755	0.0514234
		4.4	2.1			0.0666475
		5.4	2.1			0.0805347
		6.8	2.1			0.0478079
		7.6	2.1
		8.4	2.1	0.0562025	0.204372	0.0387523
		9.6	2.1
		10.4	2.1
		11.7	2.1			0.0303996
		12.6	2.1
		14.2	2.1			0.0514317
		15.5	2.1
		16.2	2.1			0.0184452
		17.6	2.1
		18.3	2.1
		19	2.1
		20.2	2.1			0.0699981
		21.1	2.1
		22.1	2.1
		23.5	2.1			0.0272299
		24.8	2.1
		26.2	2.1
		27.2	2.1
		27.9	2.1			0.0881641
		29.2	2.1			0.0232704
		30.1	2.1
		31.3	2.1
		32.7	2.1			0.050779
		34	2.1
		34.7	2.1	0.187725	0.0517381	0.0350147
		35.7	2.1
		37.3	2.1
		38.1	2.1			0.0385947
		38.9	2.1			0.0358597
		40	2.1
		41	2.1
		42.1	2.1			0.0429305
		44.6	2.1			0.0206602
		45.8	2.1			0.0378214
		54.2	2.1
		55.4	2.1	0.0670961	0.23573	0.0290689
		56.8	2.1			0.0246212
		57.5	2.1
		59.7	2.1
		62.8	2.1			0.0727672
		0	2.1			0.0491509
		6.5	2.1			0.0535513
		7.7	2.1
		8.5	2.1
		9.6	2.1	0.0387038	-0.0690195	0.112675
		11.9	2.1
		12.9	2.1
		13.8	2.1			0.0393643
		14.8	2.1
		16	2.1
		18.2	2.1
		19.8	2.1			0.044485
		21.6	2.1
		22.6	2.1
		23.8	2.1			0.168089
		24.8	2.1
		25.9	2.1
		26.9	2.1			0.0380754
		27.7	2.1
		28.8	2.1
		30.5	2.1
Banded iron formation
Siebert et al., 2005
	BIF, Moodies Group	01/078 Fe	3.15	0.11	0.59	0.89
Wille et al., 2007
	BIF, Moodies Group	01/78Fe	3.15	0.04	0.704	0.75
Duan et al., 2010
	Sideritic BIFs interval, Mt. McRae Shale	163.95	2.5	0.09	0.97	5.06
		168.36	2.5	0.17	0.88	3.35
Planavsky et al., 2014
	Iron formations, Sinqeni Formation, Pongola Supergroup, South Africa	TSB07-26- 165.47	2.95	0.05	-0.26	2.39
		TSB07-26- 165.42	2.95	0.1	-0.34	0.308
		TSB07-26- 166.065	2.95	0.09	-0.78	0.95
		TSB07-26- 166.345	2.95	0.08	-0.25	0.857
		TSB07-26- 166.385	2.95	0.06	0.07	2.179
		TSB07-26- 166.4	2.95	0.07	-0.47	1.536
		TSB07-26- 166.44	2.95	0.08	-0.6	1.589
		TSB07-26- 167.1	2.95	0.05	0.03	4.341
		TSB07-26- 167.08	2.95	0.1	-0.95	3.11
		TSB07-26- 167.65	2.95	0.09	-0.6	2.46
		PG-3-0.4	2.95	0.05	0.17	3.707
		PG-5C-1.5	2.95	0.04	0.68	9.669
		PG-6C-1.3	2.95	0.17	1.87	3.277
		PG-9-2.05	2.95	0.15	0.69	0.285
		PO5-1	2.95	0.06	0.34	3.383
		PO5-6	2.95	0.05	0.15	1.532
		P05-7	2.95	0.07	0.38	0.883
	Iron formation, Parktown Formation, Witwatersrand Supergroup, South Africa	IF-9	2.95	0.05	0.81	0.08
	Iron formation, Manjeri Formation, Zimbabwe	Z04-12	2.7	0.06	0.72	0.094
		ZO4-31	2.7	0.04	0.72	0.359
	Ironstone, Timeball Hill Formation, South Africa	B36-2001-M5	2.35	0.03	1.2	23.714
		B36-2001-M9B2	2.35	0.04	1.15	19.674
		B36-4-2001-M9B1	2.35	0.02	1.48	10.682
	Iron fromation, Biwabik Iron Formation, Animikie Basin, USA	317-12	1.88	0.05	0.04	2.42
		317-13	1.88	0.05	-0.09	1.244
		317-8	1.88	0.05	-0.46	1.129
		DE-ONC-1	1.88	0.15	-0.55	0.229
	Granular iron formation, Gunflint Iron Formation, Animikie Basin, Canada	DH3-27	1.88	0.04	0.91	0.827
		DH3-42	1.88	0.05	0.46	0.415
		DH3-43	1.88	0.06	0.64	0.475
	Iron formation, Ironwood Iron Formation, Animikie Basin, USA	DI3	1.88	0.12	2.08
	Iron formation, Biwabik Iron Formation, Animikie Basin, USA	EM-MN-1	1.88	0.13	-0.1	0.482
Kurzweil et al., 2015
	Carb-IF, Core ABDP9, Dales Gorge Fm., Hamersley Gp.	102.55m	2.48	0.03	1.76	1.4
	Carb-IF, Core ABDP9, Mt McRae Fm., Hamersley Gp.	163.5m	2.5	0.02	1.3	1.4
		179.8m	2.5	0.04	1.17	0.2
	Ox-IF or ox/carb-IF, Core ABDP9, Mt Sylvia Fm., Hamersley Gp.	190.2m	2.5	0.05	1.15	0.05
		214.5m	2.5	0.04	1.08	0.03
		219.95m	2.5	0.05	0.89	0.04
	Carb-IF, Core ABDP9, Wittenoom Fm., Hamersley Gp.	291.6m	2.54	0.03	0.97	1.2
[truncated: 678 more rows]
