# Supplementary material for: A heavy molybdenum reservoir in Neoarchean seawater tracks extensive iron oxidation
Source: Research Square preprint supplement (doi:10.21203/rs.3.rs-7181523/v1), 2025-07-24
Supplement: Supplementary file 4 [file d996e8d9267945b00fc18d3b.xlsx]

## Sheet: Sheet1
Table S3. Parameters used in the Mo isotopic mass balance model
Parameters	Explanatory note	Reference
R0 = 107 nM	Mo concentration in modern open-ocean seawater	Collier, 1985
FR = 2.87 × 1010 g yr-1	Total Mo input flux per year	Miller et al., 2011
ATotal = 3.6 × 1014 m2	Total area of modern ocean	Reinhard et al., 2013
FO = 40 × 10-6 g m-2 yr-1	Modern rate of Mo output flux in oxic settings	Scott et al., 2008
FRED = 2700 × 10-6 g m-2 yr-1	Modern rate of Mo output flux in transitional redox settings	Reinhard et al., 2013
FE = 4800 × 10-6 g m-2 yr-1	Modern rate of Mo output flux in euxinic settings	Reinhard et al., 2013
δR = 0.55‰	Mo isotopic composition of modern rivers	Neely et al., 2018
Δ98MoSW-O = 3‰	Frationation in oxic settings	Wasylenki et al., 2008
Δ98MoSW-RED = 0.7‰	Frationation in transitional redox settings	Poulson Brucker et al., 2009
Δ98MoSW-E = 0.5‰	Frationation in euxinic settings	Dahl et al., 2010
